1     **SPONTANEOUS MUTANTS OF *STREPTOCOCCUS SANGUINIS* WITH DEFECTS**  
2             **IN THE GLUCOSE-PTS SHOW ENHANCED POST-EXPONENTIAL**  
3                     **PHASE FITNESS**

4  
5             Lin Zeng<sup>#</sup>, Alejandro R. Walker, Kyulim Lee\*, Zachary A. Taylor, and  
6                     Robert A. Burne

7             Department of Oral Biology, University of Florida College of Dentistry,  
8                     1395 Center Drive, Gainesville, Florida, USA.

9  
10    **Running title:** Glucose-PTS regulates bacterial persistence

11  
12  
13    <sup>#</sup> Correspondence

Lin Zeng, PhD

[lzeng@dental.ufl.edu](mailto:lzeng@dental.ufl.edu)

14    \* Present address: Nationwide Children's Hospital, Columbus, Ohio, USA.

15    Keywords: Carbohydrate metabolism, glucose-PTS, *Streptococcus sanguinis*,  
16             pyruvate metabolism, single-nucleotide polymorphism, bacterial  
17             persistence.

## 18 **Abstract**

19 Genetic truncations in a gene encoding a putative glucose-PTS protein (*manL*,  
20 EIIAB<sup>Man</sup>) were identified in subpopulations of two separate laboratory stocks of  
21 *Streptococcus sanguinis* SK36; the mutants had reduced PTS activities on  
22 glucose and other monosaccharides. Using an engineered mutant of *manL* and  
23 its complemented derivative, we showed that the ManL-deficient strain had  
24 improved bacterial viability in stationary phase and was better able to inhibit the  
25 growth of the dental caries pathogen *Streptococcus mutans*. Transcriptional  
26 analysis and biochemical assays suggested that the *manL* mutant underwent  
27 reprogramming of central carbon metabolism that directed pyruvate away from  
28 production of lactate, increasing production of hydrogen peroxide (H<sub>2</sub>O<sub>2</sub>) and  
29 excretion of pyruvate. Addition of pyruvate to the medium enhanced the survival  
30 of SK36 in overnight cultures. Meanwhile, elevated pyruvate levels were detected  
31 in the cultures of a small, but significant percentage (~10%), of clinical isolates of  
32 oral commensal bacteria. Furthermore, the *manL* mutant showed higher  
33 expression of the arginine deiminase system than the wild type, which enhanced  
34 the ability of the mutant to raise environmental pH when arginine was present.  
35 Significant discrepancies in genome sequence were identified between strain  
36 SK36 obtained from ATCC and the sequence deposited in GenBank. As the  
37 conditions that are likely associated with the emergence of spontaneous *manL*  
38 mutations, i.e. excess carbohydrates and low pH, are those associated with  
39 caries development, we propose that the glucose-PTS strongly influences

40 commensal-pathogen interactions by altering the production of ammonia,  
41 pyruvate, and H<sub>2</sub>O<sub>2</sub>.

42

43 **Importance** A health-associated dental microbiome provides a potent defense  
44 against pathogens and diseases. *Streptococcus sanguinis* is an abundant  
45 member of a health-associated oral flora that antagonizes pathogens by  
46 producing hydrogen peroxide. There is a need for a better understanding of the  
47 mechanisms that allow bacteria to survive carbohydrate-rich and acidic  
48 environments associated with the development of dental caries. We report the  
49 isolation and characterization of spontaneous mutants of *S. sanguinis* with  
50 impairment in glucose transport. The resultant reprogramming of central  
51 metabolism in these mutants reduced the production of lactic acid and increased  
52 pyruvate accumulation; the latter enables these bacteria to better cope with  
53 hydrogen peroxide and low pH. The implications of these discoveries in the  
54 development of dental caries are discussed.

55

## 56 **Introduction**

57 Dental caries is caused by dysbiosis in the dental microbiome, where an  
58 overabundance of acid-producing (acidogenic) and acid-resistant (aciduric)  
59 bacteria such as mutans streptococci and lactobacilli, along with certain  
60 *Actinomyces*, *Scardovia*, and fungal species, drives the acidification of dental  
61 biofilms and demineralization of tooth enamel. Diets rich in carbohydrates are  
62 critical to caries formation, while host genetics and socioeconomic factors also

63 affect the incidence and severity of the disease(s) (1, 2). Organic acids, including  
64 lactic, acetic, and formic, are some of the primary products released by oral  
65 bacteria that ferment carbohydrates, which include bacteria that are considered  
66 etiological agents of caries and those that are considered commensals. Due to its  
67 low  $pK_a$  value, lactic acid is particularly damaging to tooth enamel. When dietary  
68 carbohydrates are ingested, lactate can be produced in large quantities by a  
69 group of oral streptococci that includes *Streptococcus mutans*, the primary  
70 etiological agent of dental caries. Other bacterial factors important to the  
71 ecological balance of the dental microbiome include reactive oxygen species,  
72 e.g. hydrogen peroxide ( $H_2O_2$ ) and alkaline compounds, such as ammonia. Many  
73 bacteria, *S. mutans* in particular, are sensitive to physiologically relevant  
74 concentrations of  $H_2O_2$ , and thus can be inhibited by the presence of peroxigenic  
75 commensals, mainly mitis group of streptococci, which includes *S. sanguinis*,  
76 *Streptococcus gordonii*, *Streptococcus mitis* and other commensal streptococci  
77 that are among the most abundant members of the dental microbiome (3).  
78 Generally, *S. sanguinis* and *S. gordonii* are considerably less acid tolerant  
79 (aciduric) than *S. mutans*, but carry the arginine deiminase (AD) system, which in  
80 the presence of arginine, releases ammonia and provides ATP to improve the  
81 survival and persistence of these organisms when faced with an acid challenge  
82 (4). Past research has indicated that production of both  $H_2O_2$  (5-7) and AD  
83 activities (8) by these commensals can be influenced by bacterial uptake and  
84 catabolism of specific carbohydrates.

85 For most oral streptococci, carbohydrates are primarily internalized via the  
86 phosphoenolpyruvate::sugar phosphotransferase system (PTS), which is  
87 composed of two general proteins, Enzyme I (EI) and the phospho-carrier protein  
88 HPr, and a variety of carbohydrate-specific Enzymes II (EII) that are membrane-  
89 associated permeases (9). The PTS concurrently internalizes and  
90 phosphorylates carbohydrates that can be fed into the Embden-Meyerhoff-  
91 Parnas (EMP) pathway, which primarily yields pyruvate and the energy  
92 molecules ATP and NADH. To maintain bacterial redox balance and resupply  
93 glycolysis, NADH must be oxidized back into NAD<sup>+</sup>. In oral streptococci, this can  
94 occur via lactate dehydrogenase (LDH) (10), an NADH oxidase (NOX), or other  
95 redox-coupled reactions (11). As the central point for bacterial energy  
96 metabolism and biogenesis, pyruvate can supply the tricarboxylic acid cycle  
97 (TCA) for bacteria that can conduct aerobic respiration, or alternatively can be  
98 converted to the aforementioned organic acids when oxygen is limited. As most  
99 of the streptococci have only a partial TCA cycle and lack cytochromes, the fate  
100 of pyruvate is limited to either homolactic fermentation, yielding lactic acid via the  
101 reducing activity of LDH, or heterofermentation that can produce ethanol, acetic  
102 acid, formate, and other end products depending on conditions and carbohydrate  
103 source(s)(12, 13). Oxidation of pyruvate by a few non-LDH pathways, including  
104 pyruvate dehydrogenase (PDH), pyruvate-formate lyase (Pfl), and pyruvate  
105 oxidase (POX) allows the bacteria to create more energy molecules and produce  
106 end products with either milder or no acidic properties. It is primarily the activity  
107 of POX, encoded by *spxB* in *S. sanguinis*, that produces H<sub>2</sub>O<sub>2</sub>; *S. mutans* lacks

108 *spxB* and does not produce H<sub>2</sub>O<sub>2</sub> in any significant quantities. Distribution of  
109 pyruvate between the LDH and non-LDH pathways is regulated at both the  
110 transcriptional and enzymatic levels in response to bacterial energy status,  
111 generally metabolic intermediates such as fructose-1,6-bisphosphate (F-1,6-bP),  
112 and environmental cues such as carbohydrate abundance, pH, and oxygen  
113 levels (10, 12). The LDH pathway is usually favored under low-oxygen and  
114 carbohydrate-excess conditions.

115 As one of the early colonizers of oral cavity, *S. sanguinis* is an abundant  
116 commensal species that is frequently associated with oral health (14). It is also  
117 considered an opportunistic pathogen of infective endocarditis (IE). Previous  
118 research has indicated that *S. sanguinis* can ferment a large array of  
119 carbohydrates for acid production (15). *In silico* analyses also identified PTS  
120 transporters and metabolic pathways that are comparable to those in other more-  
121 intensively studied streptococcal species, such as *S. mutans* (16, 17). Notably  
122 different from *S. mutans*, *S. sanguinis* possesses the genes necessary to carry  
123 out gluconeogenesis, oxidation of pyruvate to produce H<sub>2</sub>O<sub>2</sub>, and the full  
124 functions of the pentose phosphate pathway. Recently, a transcriptomic study  
125 delineated in *S. sanguinis* SK36 the regulon governed by the transcriptional  
126 regulator CcpA (18), which in many Gram-positive Firmicutes is the dominant  
127 regulator of carbohydrate catabolite repression (CCR), a phenomenon where the  
128 genes encoding metabolic pathways for non-preferred carbohydrates are  
129 transcriptionally suppressed until a preferred carbohydrate such as glucose has  
130 been exhausted (19). Loss of CcpA in *S. sanguinis* SK36 affected expression of

131 nearly 20% of the genome. Interestingly, studies on the effects of *ccpA* deletion  
132 in *S. sanguinis* reported enhanced secretion of H<sub>2</sub>O<sub>2</sub> without a significant change  
133 in antagonistic potential against *S. mutans*. Expression of *spxB* was shown to be  
134 regulated by CcpA, but the increased secretion by the *ccpA* mutant of pyruvate,  
135 an antioxidant, was postulated to counteract the impact of overproduction of  
136 H<sub>2</sub>O<sub>2</sub> (20, 21).

137 We recently identified a memory effect of sugar metabolism in *S. mutans*,  
138 where past catabolism of monosaccharides, such as glucose and fructose, had  
139 profound impacts on the capacity of the bacterium to utilize lactose (22). To  
140 ascertain whether the memory effect was a general behavior of oral streptococci,  
141 these investigations were expanded to include *S. sanguinis* SK36, and a deletion  
142 mutant of the lactose repressor LacR was constructed to study its function in  
143 regulating catabolism of multiple carbohydrates. Here, we report the unexpected  
144 identification of spontaneous glucose-PTS mutations in two SK36 stocks that  
145 afforded a subpopulation of the cells enhanced fitness under laboratory  
146 conditions. Further analysis indicated that the PTS plays an important role in the  
147 regulation of central carbon metabolism in *S. sanguinis* in ways that contribute to  
148 the ability of this commensal to persist under stress and to compete against the  
149 pathobiont *S. mutans*.

150

## 151 **Results**

152 **Isolation from SK36 of spontaneous mutants deficient in glucose PTS.** We  
153 previously investigated the impact on carbohydrate metabolism of deletion of a

154 lactose repressor gene *lacR* in *S. sanguinis* SK36 (22). When analyzing growth  
155 and carbohydrate transport in the *lacR* mutant of SK36, we noted an unusually  
156 severe defect in PTS activity compared to similarly constructed *lacR* mutants we  
157 had created in related bacteria. In an effort to understand the basis of this  
158 phenotype, we conducted whole genome sequencing (WGS) of the *lacR* mutant  
159 and, as a control, the parental strain of frozen stock of SK36 (here designated as  
160 strain MMZ1612). Results of the WGS indicated the presence in our wild-type  
161 laboratory strain of SK36 (MMZ1612) of 115 single-nucleotide polymorphisms  
162 (SNPs, Table S1) that were not present in the published genome of SK36  
163 available at GenBank. Notably, there were two truncations, one being a 330-bp  
164 deletion in a putative glucose-PTS gene (SSA\_1918, tentatively identified as  
165 *manL*) that encodes the A and B domains of the Enzyme II of a PTS permease  
166 (23), and the other a 342-bp deletion in an open reading frame (ORF)  
167 (SSA\_1927) that encodes for a putative transporter predicted to confer tellurite  
168 resistance (24). The SSA\_1918 would have resulted in a translational product  
169 that terminates before the EIIB domain of the apparent ManL homologue. Two  
170 PCR reactions were designed based on this information and used to assess the  
171 integrity of the *manL* gene and SSA\_1927 in random isolates selected from  
172 individual colonies grown from our MMZ1612 frozen stock. The results provided  
173 evidence that these two deletions were likely present in a subpopulation of the  
174 stock, comprising roughly 30% of the viable cells.

175 Subsequently, a second attempt was made at creating the *lacR* deletion, by  
176 requesting a different stock of SK36 (here designated MMZ1896) from the



177 laboratory of Todd Kitten, which works extensively with SK36. After performing  
178 the same genetic manipulation, similar growth phenotypes (data not shown) were  
179 noted in some of the *lacR*-null clones that again suggested a deficiency in  
180 glucose-PTS activity. WGS, followed by PCR for selected regions of the genome,  
181 indeed identified a nonsense mutation event, Q217\* (CAA→TAA), in ~10% of the  
182 population that resulted in truncation of the SSA\_1918/*manL* gene at  
183 approximately the same location as in MMZ1612. Similar to our SK36 stock  
184 (MMZ1612), 114 SNPs were identified in MMZ1896 (Kitten stock; Table S1),  
185 which, except for one, matched what was found in our freezer stock (MMZ1612).  
186 The genetic lesions in *manL* could reduce the capacity of *S. sanguinis* to utilize a  
187 number of carbohydrates commonly present in the human oral cavity, since the  
188 ManLMN permease in *S. mutans* is the primary transporter for glucose,  
189 galactose, glucosamine (GlcN) and N-acetylglucosamine (GlcNAc) (see Fig. S1  
190 for growth curves). Indeed, when a wild-type copy of the *lacR* gene was later  
191 introduced into one such *lacR*-null strain using an integration vector pMJB8 (25),  
192 the complemented strain remained deficient in growth on glucose and certain  
193 other monosaccharides dependent on the ManLMN glucose-PTS for  
194 internalization (data not shown). Nonetheless, the fact that these mutants are so  
195 well-represented in populations could indicate that there are physiological  
196 benefits associated either with the specific lesions in the glucose-PTS or with  
197 other not-yet-investigated SNPs that, under certain conditions, outweighed the  
198 reduced fitness associated with loss of a primary hexose internalization system.  
199

200 **Enhanced persistence of *manL* mutants under acidic stress.** To further  
201 investigate the involvement of the glucose-PTS in the observed behaviors, a  
202 number of *manL* deletion mutants were constructed in the backgrounds of wild-  
203 type isolates of SK36 (MMZ1612 and MMZ1896) via the allelic exchange method  
204 (Table 1). To rule out the possibility of additional spontaneous mutations  
205 obscuring the effects of *manL* deletion, two *manL*-complemented derivatives  
206 (*manLComp*) were constructed in the *manL*-null background via a “knock-in”  
207 approach (26). The wild-type parent SK36, a *manL* mutant and a *manLComp*  
208 strain were first studied for their growth phenotypes. Strains were cultivated to  
209 exponential phase in BHI before diluting into the chemically-defined medium  
210 FMC formulated with glucose, galactose, GlcN or GlcNAc as the sole  
211 carbohydrate source. Compared to the wild type and the complemented strain,  
212 *manL* mutant strains showed reduced growth rates on glucose and galactose,  
213 and especially poor growth on the amino sugars GlcN and GlcNAc (Fig. S2). The  
214 growth defects in the *manL* mutant were similar to those of the aforementioned  
215 *lacR* mutant (Fig. S1). To assess long term viability and effects of pH thereon, we  
216 streaked the strains on BHI agar or BHI agar supplemented with 50 mM  
217 potassium phosphate buffer (pH 7.2). Wild-type SK36 remained viable for at least  
218 3 weeks at 4°C on the buffered plates, whereas viable cells could not be  
219 recovered from unbuffered plates after a week or less. Conversely, the *manL*  
220 mutant survived one to two weeks longer than SK36 on unbuffered BHI agar.  
221 When tested for growth characteristics by diluting directly from overnight cultures,  
222 deletion of *manL*, or addition of phosphate buffer in the overnight cultures,

223 significantly shortened the lag phase following sub-culture into fresh BHI or into  
224 TY medium supplemented with glucose (TY-Glc) (Fig. 1AB). These effects  
225 indicated improved viability in the overnight cultures as a result of *manL* deletion,  
226 and that loss of viability likely involved exposure to lower pH values than in  
227 buffered media. To further examine the relative fitness of the strains, overnight  
228 cultures of SK36 and the *manL* mutant were used in a competition assay by  
229 mixing in a 1:1 ratio (based on OD<sub>600</sub>) and diluting 1000-fold into fresh BHI  
230 medium. After one more round of dilution (at 5 h) followed by an overnight  
231 incubation (24 h), cells were plated for CFU enumeration on selective agar  
232 plates. Competition indices (CI) were calculated using CFUs at 0 and 24 h time  
233 points. Out of the three replicates, *manL* outcompeted the wild-type parent by a  
234 large margin in two biological replicates, with CI = 25.1 and 9.9; and in the third  
235 replicate SK36 was no longer detected. These results strongly supported the  
236 notion of enhanced fitness due to deletion of *manL*, providing a potential  
237 explanation for the emergence of glucose PTS-negative isolates under laboratory  
238 conditions.

239 A series of biochemical experiments were carried out to compare the  
240 acidogenic and aciduric properties of SK36 and the constructed isogenic *manL*  
241 mutant. First, PTS assays (Fig. 1C), which measure *in vitro* sugar  
242 phosphorylation by permeabilized bacterial cells, showed a significant reduction  
243 in the ability of the *manL* mutant to transport glucose or mannose, thus  
244 confirming the predicted function of the glucose-PTS operon in which the *manL*  
245 gene resides. Next, a pH drop experiment was performed using late-exponential

246 phase cultures prepared with BHI. When provided with 50 mM glucose, the *manL*  
247 mutant showed a slightly slower rate of lowering the pH, but the final pH attained  
248 by the mutant was slightly lower, by about 0.14 pH units at the 40-min mark, than  
249 the wild type (Fig. 2A). The *manLComp* strain produced a resting pH comparable  
250 to the *manL* mutant, suggesting that the difference among these strains may not  
251 be biologically significant. However, when the same cultures were first frozen at -  
252 80°C, thawed and then their optical density was normalized before the pH drop  
253 assay, the *manL* mutant showed a much greater capacity to lower the  
254 environmental pH than the wild type, dropping it at a faster rate and producing a  
255 significantly lower resting pH at the end of a 1-hour assay (Fig. 2B). Similar  
256 results were obtained when cells harvested from TY-Glc cultures were used in  
257 pH drop (data not shown). These results suggested that the *manL* mutant was  
258 better at maintaining viability and/or metabolic activity after a freeze/thaw cycle.

259 Furthermore, when SK36 and the *manL* mutant were assessed for aciduricity  
260 by growing on acidified agar plates or acidified BHI broth (adjusted to pH 6.0 and  
261 pH 5.5, respectively), there was little to no difference in growth phenotypes  
262 between the mutant and the wild type under either condition (data not shown).

263 However, when these strains were subjected to acid killing by incubating in 0.1 M  
264 glycine, pH 3.8, the wild type rapidly aggregated, whereas there was no obvious  
265 evidence of aggregation in the suspension of the *manL* mutant throughout the 1-  
266 h period. Since aggregation could greatly reduce the accuracy of CFU  
267 enumeration, we did not assess survival at pH 3.8 by plating. However, both the

268 sensitivity to freezing and thawing and the aggregation differences between the  
269 wild-type and *manL* deletion strains point to differences in envelope integrity.

270 Next, the strains were cultured batch-wise in BHI, in which glucose is the  
271 primary carbohydrate source, or in TY prepared with glucose or lactose, and the  
272 final pH after  $\geq 20$  h of incubation were recorded. These pH measurements  
273 showed an intriguing pattern. In overnight TY-Glc cultures, the *manL* mutant  
274 achieved a significantly higher final pH than the wild type (Fig. 3A), whereas in  
275 BHI cultures the *manL* mutant had a slightly lower pH than the wild type (Fig.  
276 3C). The pH measurements of *manLComp* cultures matched those of the wild  
277 type. Meanwhile, little difference in pH was seen among the three strains after  
278 overnight growth in TY-lactose (Fig. 3A). This medium-specific effect on final pH  
279 after  $\geq 20$  h of growth could suggest a potential impact of the glucose-PTS on the  
280 ability of the strains to produce alkali via the arginine deiminase (AD) system,  
281 which releases ammonia that neutralizes acids both inside and outside of the  
282 cells (27). This hypothesis was tested first by RT-qPCR measuring the levels of  
283 mRNA for *arcA*, encoding the arginine deiminase enzyme, in cells cultured in TY-  
284 Glc or BHI. The results (Fig. 3D) indeed showed a significant increase in  
285 expression of *arcA* associated with loss of *manL*. Importantly, in overnight TY-Glc  
286 cultures, pH measurements of an *arcA manL* double mutant were significantly  
287 lower than the mutant deficient in *manL* alone (Fig. 3B). Therefore, enhanced  
288 activities of the AD system were in large part responsible for the increased pH  
289 seen in TY-Glc cultures of the *manL* mutant. To reconcile this conclusion with the  
290 pH measurements from BHI cultures, we posited that the different impacts of

291 *manL* deletion were due to a lack of significant levels of free arginine in BHI. As a  
292 simple test of this hypothesis, L-arginine was added to BHI medium at  
293 supplemental concentrations of 1 mM and 5 mM before cultivation of these three  
294 strains. The results (Fig. 3C) showed an arginine-dependent increase in final pH  
295 in all cultures, with the *manL* mutant yielding higher pH than the wild type when 5  
296 mM supplemental arginine was added. Collectively, these results demonstrated  
297 significant roles of the glucose-PTS in regulating aciduricity and alkali generation,  
298 thereby affecting the competitiveness of the commensal bacterium under acidic  
299 conditions, such as those created by the fermentation of large amounts of  
300 carbohydrates.

301

302 **The *manL* mutant produces more H<sub>2</sub>O<sub>2</sub> and less lactate.** *S. sanguinis* is  
303 considered a health-associated commensal and has antagonistic properties  
304 toward the major etiologic agent of dental caries, *S. mutans*; with a primary  
305 antagonistic factor being hydrogen peroxide (H<sub>2</sub>O<sub>2</sub>). When the *manL* deletion  
306 mutant and its complemented derivative *manLComp* were tested for their abilities  
307 to release H<sub>2</sub>O<sub>2</sub> on agar plates, visualized as precipitation zones on Prussian  
308 blue plates (28), the results showed that loss of *manL* significantly enhanced the  
309 release of H<sub>2</sub>O<sub>2</sub> by the bacterium (Fig. 4A). When tested in a plate-based  
310 competition assay together with *S. mutans*, the *manL* mutant showed a  
311 significantly increased ability to inhibit *S. mutans* UA159, relative to the wild-type  
312 SK36 (Fig. 4B). The UA159 strain used in this study was a *perR*<sup>+</sup> stock obtained  
313 from ATCC, as opposed to the UA159 derivative that carries a spontaneous

314 mutation in *perR* that truncates PerR and reduces sensitivity to H<sub>2</sub>O<sub>2</sub> and  
315 oxidative stress in general (29). When *S. sanguinis* strains were each mixed with  
316 UA159 before being placed onto the agar plates, the *manL* mutant similarly  
317 outperformed its wild-type parent in competition against UA159, as quantified by  
318 CFU enumeration (data not shown). The *manLComp* strain behaved similarly to  
319 the *manL*<sup>+</sup> parent strain in these assays (Fig. S3). Consistent with the role of  
320 ManLMN in transporting glucose, both of these phenotypes depended on the  
321 presence of glucose (20 mM) and oxygen, and were not seen when lactose (10  
322 mM) was used in place of glucose as the growth carbohydrate (Fig. 4). The *manL*  
323 mutant, however, showed enhanced H<sub>2</sub>O<sub>2</sub> production on TY agar formulated with  
324 a combination of glucose and galactose, or with only galactose, GlcN, or GlcNAc  
325 (Fig. 4). As noted above, these four carbohydrates are transported primarily via  
326 the ManLMN PTS permease in closely related bacteria (30-32).

327 As H<sub>2</sub>O<sub>2</sub> is generated by pyruvate oxidase (SpxB) during the conversion of  
328 pyruvate to acetyl phosphate (AcP) in the presence of oxygen, we reasoned that  
329 deletion of *manL* could have altered the flow of pyruvate in bacterial central  
330 metabolism (12). Under carbohydrate-rich and oxygen-limited conditions,  
331 streptococci are known to produce large quantities of lactate by reducing  
332 pyruvate, a reaction that is catalyzed by lactate dehydrogenase (LDH) and  
333 coupled to the conversion of NADH to NAD<sup>+</sup> (33). To test if enhanced shunting of  
334 pyruvate through SpxB might diminish lactate production, lactate levels were  
335 measured in the supernates of bacterial batch cultures prepared with TY medium  
336 supplemented with glucose or lactose as the carbohydrate source. The results

337 showed reduced lactate levels, by about 40%, in cultures of the *manL* mutant  
338 grown on glucose, compared to the wild type grown on glucose (Fig. 1D); an  
339 outcome supporting that pyruvate was directed away from lactate generation. On  
340 the other hand, no significant differences in lactate accumulation were seen in  
341 cultures grown on lactose. It is likely that reduced homolactic fermentation by the  
342 *manL* mutant resulted in redirection from lactate production to acids with a higher  
343 *pKa*, e.g., acetate, or other non-acidic end products, such as ethanol and  
344 acetoin, which may enhance the survival of *S. sanguinis* by increasing the  
345 intracellular pH and reducing the amount of damage caused by low  
346 environmental pH. However, this interpretation would not be entirely consistent  
347 with the modestly lower environmental pH achieved by the *manL* mutant when  
348 growing in BHI medium (Fig. 3C).

349

350 **Loss of *manL* alters central metabolism.** To further characterize the role of  
351 the glucose-PTS in carbohydrate metabolism by *S. sanguinis*, RT-qPCR was  
352 performed to measure the mRNA levels of genes involved in central metabolism  
353 and related pathways in the *manL* mutant grown with glucose or lactose (Fig. 5  
354 and Fig. S4). Consistent with the aforementioned phenotypes, transcriptional  
355 analysis indicated that the *manL* mutant, when growing on glucose, had reduced  
356 expression of the gene for lactate dehydrogenase (*ldh*). Also reduced was the  
357 expression of *pykF* gene, encoding for pyruvate kinase, which converts PEP into  
358 pyruvate with the concomitant generation of ATP. Reductions in mRNA levels of



359 *pykF* and *ldh* are indicative of decreases in glycolytic rate and homolactic  
360 fermentation, respectively.

361 Conversely, the *manL* mutant displayed enhanced expression by genes in  
362 oxidative pyruvate pathways that included *nox*, *spxB*, *pfl*, *acoB*, *pta*, and *ackA*.  
363 NADH oxidase (NOX) is required for oxidation of NADH into NAD<sup>+</sup> in the  
364 presence of oxygen, resulting in formation of H<sub>2</sub>O. The levels of *pfl* mRNA, for a  
365 pyruvate-formate lyase that catalyzes the conversion of pyruvate into acetyl-CoA  
366 and formate, and *acoB* (SSA\_1176), which belongs to the acetoin  
367 dehydrogenase operon, were also higher. As a neutral product of pyruvate  
368 catabolism, acetoin can be produced and released without influencing  
369 cytoplasmic or environmental pH, or it can be converted by the acetoin  
370 dehydrogenase complex into acetyl-CoA (34). Gene products of *pta* and *ackA*  
371 are required for further metabolism of acetyl-CoA, leading to production of  
372 acetate with concurrent generation of ATP. While SpxB is directly responsible for  
373 oxidation of pyruvate with production of H<sub>2</sub>O<sub>2</sub>, Nox was found to be required for  
374 optimal H<sub>2</sub>O<sub>2</sub> release (35, 36). Enhanced expression of the genes for these  
375 enzymes substantiated earlier observations of increased H<sub>2</sub>O<sub>2</sub> release by the  
376 *manL* mutant, as well as replacement of lactate by alternative end products, such  
377 as acetate. In each case, the *manL* mutant showed significant changes in gene  
378 expression when growing on glucose, but not on lactose, and the *manLComp*  
379 strain produced the mRNAs of interest at levels comparable to the wild type (Fig.  
380 S4).

381

382 **The *manL* mutant releases more pyruvate, but less eDNA.** Catabolite control  
383 protein CcpA negatively regulates the expression of the pyruvate oxidase gene  
384 *spxB* and production of H<sub>2</sub>O<sub>2</sub> in *S. sanguinis* strain SK36 (20). However, the *ccpA*  
385 mutant failed to show improved inhibition of *S. mutans* UA159 *in vitro*, a  
386 phenotype that was attributed to overproduction and release of pyruvate, an  
387 antioxidant that can scavenge H<sub>2</sub>O<sub>2</sub> and thereby diminish its antagonism of *S.*  
388 *mutans* (21). Since deletion of the glucose-PTS impedes growth on glucose, it  
389 was reasoned that a *manL* mutant should experience a reduction in CCR, which  
390 could lead to production of elevated levels of H<sub>2</sub>O<sub>2</sub> (as noted in Fig. 4) and  
391 perhaps even pyruvate. In contrast to a *ccpA* mutant, an increase in H<sub>2</sub>O<sub>2</sub>  
392 secretion due to loss of *manL* was not evident when cells were grown on lactose,  
393 but the effects were especially evident when glucose, galactose, GlcN, or  
394 GlcNAc was the primary growth carbohydrate. In fact, the *ccpA* mutant failed to  
395 show any difference in H<sub>2</sub>O<sub>2</sub> secretion from the wild type when grown on  
396 galactose or the amino sugars. It appeared that loss of *manL* affected H<sub>2</sub>O<sub>2</sub>  
397 production more broadly than *ccpA* deficiency and the effects of mutations could  
398 manifest differently depending on the growth carbohydrate.

399 Significantly, the *ccpA* mutant failed to inhibit UA159 in our plate assays, as  
400 suggested previously (21), but the *manL* mutant inhibited UA159 more so than  
401 the wild type on all carbohydrates tested except lactose (Fig. 4B). We also  
402 measured pyruvate levels in overnight TY-Glc batch cultures of the *manL* or *ccpA*  
403 mutant and the results (Fig. 6A) showed significantly more pyruvate in *manL*  
404 cultures (0.37 mM/OD<sub>600</sub>) than both the WT (0.07 mM/OD<sub>600</sub>) and the *ccpA*

405 mutant (0.17 mM/OD<sub>600</sub>). No effect of either mutation was noted in cells grown on  
406 lactose. Monitoring of pyruvate release throughout the growth phases gave no  
407 indication that pyruvate was being actively reinternalized at any growth stage  
408 (Fig. 6BC); *S. mutans* actively reinternalizes pyruvate when it begins to enter  
409 stationary phase (37). The OD<sub>600</sub> results (Fig. 6BC) from this experiment (also  
410 see Fig. S5A) revealed enhanced biomass of the *manL* mutant throughout the  
411 24-h period. To explore the possibility that deletion of *manL* affected bacterial  
412 autolysis, extracellular DNA (eDNA) levels were measured in overnight TY-Glc  
413 cultures using SYTOX Green. Significantly lower eDNA levels were present in  
414 the cultures of the *manL* mutants than in cultures of the wild type (Fig. 6D),  
415 suggesting that the *manL* mutant lysed less than the wild type; when lysis of  
416 streptococci occurs, it is usually in stationary phase. Interestingly, a *manL ccpA*  
417 double mutant of SK36 produced pyruvate at levels comparable to the wild type  
418 (Fig. 6A). Furthermore, the *manL ccpA* double mutant showed a greater capacity  
419 to inhibit the growth of UA159 than the *ccpA* mutant (Fig. 4B). These results  
420 indicate that the ManL component of the glucose-PTS is capable of regulating  
421 central metabolism independently of CcpA.

422 Transcriptional analysis was again performed in order to better test this  
423 hypothesis. The results of the RT-qPCR (Fig. 5) showed that most genes  
424 involved in pyruvate metabolism were regulated in similar fashions in the *manL*  
425 and *ccpA* mutants, except for pyruvate dehydrogenase (*pdh*) and acetoin  
426 dehydrogenase genes. Specifically, whereas the *ccpA* mutant produced about 5  
427 times more *pdhD* mRNA than the wild type, the *manL* mutant showed no

428 significant change in *pdhD* expression. The levels of *acoB* mRNA remained  
429 largely unchanged in the *ccpA* mutant but were increased > 2-fold in the *manL*  
430 mutant. Considering the significance of Pdh in metabolizing pyruvate under  
431 aerobic conditions, its enhanced expression in the *ccpA*, but not in the *manL*  
432 mutant, could provide an explanation for the higher levels of pyruvate being  
433 detected in the glucose cultures of the *manL* mutant. In addition, both the *ccpA*  
434 and the *manL* mutants produced significantly lower *ldh* mRNA than the wild type,  
435 consistent with the apparent redirection of pyruvate away from lactate production.  
436 It was not immediately clear why such high levels of extracellular pyruvate did not  
437 suppress H<sub>2</sub>O<sub>2</sub>-mediated antagonism of UA159 by the *manL* mutant (Fig. 4B).  
438 However, we hypothesized that accumulation of pyruvate itself could be a  
439 contributing factor to the enhanced fitness of the *manL* mutant in acidic  
440 environments and when the levels of H<sub>2</sub>O<sub>2</sub> were elevated, especially in  
441 consideration that H<sub>2</sub>O<sub>2</sub> can trigger autolysis and eDNA release in *S. sanguinis*  
442 (26, 38). Aside from being an antioxidant, metabolism of pyruvate via the  
443 oxidative pathways should yield additional ATP, which is beneficial to  
444 persistence, especially for maintaining pH homeostasis via the activity of F<sub>1</sub>F<sub>o</sub>-  
445 ATPase (39). Thus, the enhanced competitive fitness of a *manL* mutant of *S.*  
446 *sanguinis* may be attributable to a variety of factors that influence antagonism  
447 against *S. mutans*, as well as survival of *S. sanguinis* in the presence of *S.*  
448 *mutans* and its antagonistic products.  
449

450       **Exogenous pyruvate benefits SK36.** To test the effects of pyruvate on the  
451 fitness of *S. sanguinis*, SK36 was inoculated in BHI with or without 5 mM  
452 pyruvate and incubated overnight ( $\geq 20$  h) before the cultures were diluted and  
453 enumerated for CFUs on agar plates. At the same time, the cultures were diluted  
454 (1:100) into TY-Glc with and without 5 mM pyruvate before growth was  
455 monitored. Strain UA159 of *S. mutans* was included for comparison, as it is  
456 known to be highly aciduric. In both assays, inclusion of pyruvate in overnight  
457 BHI cultures significantly enhanced the persistence of SK36, as assessed by  
458 CFU ( $P < 0.05$ , Fig. 7A) and growth rate of subcultures in TY-Glc (Fig. 7B).  
459 Addition of pyruvate in TY-Glc also enhanced the growth rate of SK36 that was  
460 diluted from overnight cultures prepared without pyruvate (Fig. 7C). When the  
461 *manL* mutant of SK36 was cultured with added pyruvate, it too produced  
462 enhanced CFU counts, although its CFU counts were greater than the wild type  
463 with or without addition of pyruvate (Fig. 7A). By contrast, *S. mutans* UA159  
464 showed no statistically significant change in either overnight viable counts or  
465 growth characteristics of TY-Glc cultures in response to the presence of 5 mM  
466 pyruvate. These results suggested that the presence of pyruvate in the  
467 environment could benefit the persistence of the commensal relative to *S.*  
468 *mutans*.

469       In light of the presence of *manL* mutations and the abundance of other SNPs  
470 (Table S1) detected in our two SK36 stocks, we obtained a third stock of SK36  
471 from ATCC and constructed a *manL* deletion mutant for comparison. Studies of  
472 this new mutant in persistence, antagonism of UA159, release of H<sub>2</sub>O<sub>2</sub> and

473 pyruvate, as well as other growth characteristics showed effects highly similar to  
474 the *manL* mutants created using the other two strains of SK36 (Fig. S5 and data  
475 not shown). All three SK36 stocks also displayed highly similar phenotypes in  
476 these assays (Fig. S5). To our surprise, WGS indicated that the ATCC SK36  
477 stock (here designated MMZ1922) carries nearly identical SNPs (totaling 116,  
478 Table S1) to those of the aforementioned two stocks, raising the possibility that  
479 the genome sequence of SK36 deposited at GenBank was derived from a strain  
480 that is significantly different from what is available from ATCC and what is being  
481 used by at least two oral streptococcus research groups. The basis for the  
482 differences between the sequence deposited in GenBank and that of the strains  
483 used here is not known, but could be accounted for by advances in sequencing  
484 technology since the original sequence was deposited. Meanwhile, an analysis  
485 using multi-locus sequence typing (Fig. S6) placed both the GenBank sequence  
486 and the assembled genome of the ATCC stock (MMZ1922) within the species of  
487 *S. sanguinis* as recently determined by sequencing and phylogenomic analysis of  
488 25 low-passage clinical isolates of *S. sanguinis* (40).

489

490 **Detection of extracellular pyruvate in cultures of oral bacteria.** Detection  
491 of spontaneous *manL* mutants in SK36 raised the possibility that isolates with  
492 similar genetic lesions could exist in nature, and those isolates would likely  
493 display similar phenotypes, including increased excretion of pyruvate. This  
494 hypothesis was tested using two cohorts of oral bacterial isolates made available  
495 from previous studies, including 63 commensal isolates from mostly caries-free

496 donors (40) and 96 clinical isolates from both caries-free and caries-active  
497 subjects (41). When grown with TY-glucose or TY-lactose overnight in an aerobic  
498 atmosphere, a majority (~90%) of these bacteria did not produce significant  
499 levels of pyruvate in their culture supernates. However, a total of 16 strains had  
500 significant levels of pyruvate ( $>0.15$  mM/OD<sub>600</sub>) in their culture media 20 h post  
501 inoculation (Fig. S7A). These pyruvate-positive strains included multiple oral  
502 streptococcal species, from both caries-free and caries-active hosts. The issue of  
503 whether the original stocks of these isolates contained subpopulations of *manL*  
504 mutants was not evaluated because of the unrealistic scope of such an  
505 undertaking. Still, it must be considered that the results could reflect the sum of  
506 heterogeneous behaviors of genetically different subpopulations, the proportions  
507 of which may differ by isolate.

508 We next cultivated unstimulated whole saliva samples obtained from four  
509 healthy donors in a semi-defined medium containing various carbohydrates (42),  
510 including glucose, fructose, galactose, GlcN, GlcNAc, lactose, sucrose, or  
511 maltose, then measured pyruvate levels in the supernates. Out of four saliva  
512 samples, three produced significantly higher pyruvate levels on certain  
513 carbohydrates, with each showing a different profile in response to the primary  
514 carbohydrate in the medium (Fig. S7B). These latter results demonstrate that  
515 pyruvate can accumulate in complex populations of oral bacteria that more  
516 closely mimic the composition of the salivary microbiome in a carbohydrate-  
517 dependent manner.

518

519

## 520 **Discussion**

521 In addition to acidogenicity, acid tolerance (aciduricity) is a key attribute of  
522 organisms that contribute to the initiation and progression of dental caries. The  
523 continued metabolic activities of acid-tolerant bacteria under acidic conditions  
524 shifts the ecological balance away from health-associated, acid-sensitive  
525 commensals, enhancing the virulence of the biofilms. While much attention has  
526 been paid to the aciduricity and acid tolerance response (ATR) by mutans  
527 streptococci, especially *S. mutans*, limited information is available regarding  
528 many of the abundant commensal streptococci. These bacteria make up the bulk  
529 of the dental microbiome and remain part of the biofilm even during significant  
530 caries events (43), and many are capable of fermenting carbohydrates as  
531 efficiently or superior to the etiological agents of caries (44, 45). Here we  
532 reported the identification of spontaneous mutants of *S. sanguinis* SK36  
533 deficient, in whole or in part, in the ManL component of the glucose-PTS that  
534 showed improved fitness in stationary phase and acidic conditions. These  
535 phenotypic changes coincided with a shift of central carbon metabolism away  
536 from lactate generation in favor of pyruvate-oxidizing enzymes, resulting in  
537 increased secretion of H<sub>2</sub>O<sub>2</sub> and pyruvate, and increased arginine deiminase  
538 activity. As such, the *manL* mutant of SK36 not only outcompeted its isogenic  
539 parent in stationary phase, but also showed significantly greater competitiveness  
540 against *S. mutans* on agar plates. As the conditions that likely contributed to the  
541 emergence of these mutants - growth in rich media containing high



542 concentrations of glucose and the resultant low pH - are also expected in caries-  
543 conducive dental biofilms, our findings could have relevance in understanding the  
544 role of the glucose-PTS in regulating bacterial metabolism in ways that affect the  
545 overall aciduricity of dental biofilms. The findings also give rise to the hypothesis  
546 that there may be selection for mutants of commensal streptococci with defects  
547 in the ManL component of the PTS under cariogenic conditions that allow these  
548 variants to better survive, and perhaps even contribute to, cariogenic conditions.

549 Why is the *manL* mutant better at surviving in an acidic environment? When  
550 using fast-growing, exponential phase cells, pH drop and acid killing assays did  
551 not reveal the *manL* mutant to be more acid tolerant than the wild type.

552 Nevertheless, it was clear that the mutant fared better under certain acidic  
553 conditions and was better able to maintain viability following a freeze-thaw cycle.

554 We were also able to show that after prolonged incubation in the stationary  
555 phase, either on agar plates or in liquid cultures, the *manL* mutant had  
556 significantly greater viability than the wild type. It is possible that the most  
557 pronounced phenotype of the *manL* deletion occurs during the stationary phase,  
558 when the pH happens to be the lowest. For example, the *manL* mutant could  
559 have reduced propensity for autolysis, as our results have indicated (Fig. 6D),  
560 and it is known that extreme pH and/or high H<sub>2</sub>O<sub>2</sub> levels can trigger cells to  
561 undergo autolysis (26, 38, 46). Based on qRT-PCR data, we hypothesize that a  
562 few mechanisms could be responsible for enhanced fitness of mutants lacking an  
563 intact ManLMN permease: i) altered metabolic end products, namely less lactate  
564 and more acetate, perhaps even change in acetoin levels, result in elevated

565 intracellular pH with less damage to critical cellular components; ii) enhanced  
566 activities in pyruvate oxidative pathways provide more efficient production of  
567 ATP; iii) increased expression of the AD system allows cells to catabolize  
568 arginine, which benefits the bacterium both bioenergetically through creation of  
569 ATP and improved pH homeostasis; and iv) reduced LDH activity creates a  
570 surplus of pyruvate, which could scavenge H<sub>2</sub>O<sub>2</sub> or provide a substrate to extend  
571 ATP production or be used for biogenesis pathways that enhance persistence  
572 under stressful conditions (e.g. membrane remodeling). Though not widespread  
573 in streptococci, *S. sanguinis* genome harbors putative genes required for  
574 gluconeogenesis which converts pyruvate into metabolic intermediates and  
575 precursors required for critical biogenesis pathways (16, 17). Indeed, pyruvate  
576 has been shown to resuscitate VBNC (viable but not culturable) *E. coli* cells by  
577 promoting macromolecular biosynthesis (47). Intracellular pyruvate could also  
578 potentially serve as a signal that alters gene regulation in favor of acid resistance  
579 (48). Further study on this subject, e.g. analysis at the systems level via  
580 proteomics or metabolomics, will be needed for confirmation of these theories.

581 Recently *S. mutans* was shown to release pyruvate as an overflow metabolite,  
582 which could then be reinternalized via dedicated transporters once excess  
583 glucose in the environment is depleted (37). *S. mutans* possesses two  
584 holin/antiholin-like proteins, LrgAB, that are responsible for transporting pyruvate  
585 at the start of stationary phase. Research has suggested the existence of  
586 additional transporters or mechanisms for pyruvate to impact the growth of *S.*  
587 *mutans* (49). The genome of *S. sanguinis* lacks homologues of either gene, but

588 *S. sanguinis* and other *spxB*-encoding species do release pyruvate in varying  
589 amounts to the surroundings, which can decrease the damaging effects of H<sub>2</sub>O<sub>2</sub>  
590 (21). Our measurements of exogenous pyruvate did not seem consistent with an  
591 highly active mechanism for reinternalization of pyruvate in SK36 (Fig. 6BC), yet  
592 addition of exogenous pyruvate improved bacterial persistence in overnight  
593 cultures (Fig. 7; Fig. S5B). Relative to the control, cultures with added pyruvate  
594 showed enhanced viability when sub-cultured. Meanwhile, pyruvate treatment  
595 failed to enhance the final OD<sub>600</sub> or pH of overnight cultures, however it did  
596 reduce eDNA release by a modest amount (23%, *P* < 0.05; Fig. S5ACD). Again,  
597 these results run counter to the existence of a dedicated pyruvate transporter for  
598 *S. sanguinis*, however they do not rule out that pyruvate uptake occurs  
599 nonspecifically. Alternatively, as H<sub>2</sub>O<sub>2</sub> can diffuse freely through cell membranes,  
600 pyruvate could impact bacterial physiology simply by reacting with H<sub>2</sub>O<sub>2</sub> in the  
601 environment.

602 How does the glucose-PTS regulate multiple metabolic pathways? Excess  
603 amounts of exogenous glucose can inhibit oxidative phosphorylation in favor of  
604 ethanol or lactate fermentation; a phenomenon termed the Crabtree effect in  
605 eukaryotic systems, e.g. yeast and tumor cells (50), or carbon catabolite  
606 repression (CCR) in facultatively anaerobic bacteria. The genetic mechanism  
607 responsible for this effect in most Gram-positive bacteria has been attributed to  
608 catabolite control protein CcpA, although recent research has pointed to other  
609 PTS-specific, CcpA-independent mechanisms, particularly in streptococci (19,  
610 51-54). Our transcription analysis (Fig. 5) showed altered expression, due to loss

611 of *manL*, in many central metabolic pathways, for which we envisioned three  
612 possible mechanisms. First, loss of *manL*, with the accompanying reduction in  
613 PTS activity could significantly impede PTS-mediated glucose influx, thereby  
614 reducing the steady state concentrations of the critical metabolic intermediates  
615 G-6-P and F-1,6-bP. In turn, the enzymatic activity of LDH, which is known to be  
616 allosterically activated by F-1,6-bP (10), also decreases. As LDH activity is  
617 critical to maintaining the NAD<sup>+</sup>/NADH balance, this change would likely affect  
618 the expression of multiple genes responsive to intracellular redox balance (36,  
619 55), including *ldh* itself (56). This rationale could likewise be applied to cells  
620 growing in GlcN or GlcNAc, the catabolism of which yields F-6-P and  
621 subsequently F-1,6-bP. However, this would not apply in the case of galactose  
622 metabolism, as neither the tagatose pathway nor the Leloir pathway yields these  
623 intermediates. The second possibility involves CcpA-dependent regulation of  
624 gene expression. Since the ManLMN permease is the primary transporter of a  
625 number of monosaccharides, its activity is needed to sustain a certain level of  
626 energy intermediates, namely G-6-P, F-1,6-bP, and ATP, that are crucial to the  
627 function of the major catabolite regulator CcpA. A recent study of the CcpA  
628 regulon in *S. sanguinis*, performed using cells cultured in rich-medium, has  
629 revealed the various pathways and cellular functions that are controlled by CcpA  
630 (18). This list included *manL*, *pfl*, *spxB*, and several hundred other genes. The  
631 third scenario would be CcpA-independent. Our transcription analysis (Fig 5)  
632 indicated that *ldh*, *nox*, the *arc* operon, and the *pdh* operon are affected by the  
633 deletion of *manL* gene, however they were not identified as part of CcpA regulon

634 in the aforementioned study (18); despite the fact that CcpA does control *arc*  
635 gene expression in the metabolically similar bacterium *S. gordonii* (8). Compared  
636 to the *ccpA* mutant, the *manL* mutant showed significantly more drastic effects on  
637 H<sub>2</sub>O<sub>2</sub> production when growing on glucose, galactose, GlcN, GlcNAc, or a  
638 combination of glucose and galactose. Except for glucose or glucose and  
639 galactose, the *ccpA* mutant actually behaved much like the wild type (Fig. 4).  
640 Likewise, production of H<sub>2</sub>O<sub>2</sub> by the *manL ccpA* double mutant matched that of  
641 the *ccpA* mutant in most cases, but was greater than that of the *ccpA* mutant on  
642 the amino sugars. Further, while a *nox* mutant showed a greatly reduced  
643 capacity to release H<sub>2</sub>O<sub>2</sub>, a *manL nox* double mutant produced more H<sub>2</sub>O<sub>2</sub> than  
644 the *nox* mutant did under most conditions (Fig. 4). Although *spxB* is under the  
645 direct control of CcpA, our findings strongly support a CcpA-independent, PTS-  
646 specific pathway for regulating SpxB and related activities. A recent study on  
647 glucose-dependent regulation of *spxB* in *S. sanguinis* and *S. gordonii* identified  
648 significant distinctions between these two commensals in their response to  
649 availability of glucose (20), suggesting the presence of regulatory mechanisms  
650 beyond CcpA that could control pyruvate metabolism. We also previously  
651 reported that the glucose-PTS was capable of exerting catabolic control,  
652 independently of CcpA, over a fructanase gene (*fruA*) in *S. gordonii* (53).

653 In a caries-conducive dental plaque, rapid fermentation of dietary  
654 carbohydrates by lactic acid bacteria creates both detrimentally low pH and  
655 decreases the amount of carbohydrate available to commensals. These *in vivo*  
656 conditions do resemble that of a post exponential-phase batch culture whenever

657 carbohydrate-rich media are used to grow streptococci. Such conditions could  
658 select for the *manL* mutations as the populations adapt to the stresses. In line  
659 with this reasoning, we have provided evidence supporting the existence of  
660 bacteria or mutants with decreased LDH activity and increased pyruvate  
661 oxidation and excretion within laboratory and clinical isolates, and shown  
662 variability in pyruvate production with a small set of *ex vivo* cultures grown from  
663 four different saliva donors. It is also understood that pyruvate exists in the oral  
664 cavity at varying levels, dependent upon the metabolic status and the functional  
665 makeup of the microbiome (57, 58). We recognize the fact that many of these  
666 isolates and multi-species cultures need further characterization in their  
667 metabolic capacities, as well as genetic composition. Nonetheless, the presence  
668 of these mutants in populations supports that there are advantages to the *manL*  
669 mutation, and perhaps other not-yet-identified mutations, under conditions such  
670 as those associated with caries development. Further, most of these bacteria are  
671 likely considered commensals, yet the impact of the physiological activities of  
672 these mutants on the dental microbiome remains unexplored. For example, *S.*  
673 *mutans* and other bacteria capable of actively transporting pyruvate could utilize  
674 exogenous pyruvate as a nutrient or for protection from oxidative stress. Previous  
675 studies in *S. mutans* show that the pyruvate dehydrogenase pathway is induced  
676 under starvation, contributing to aciduricity and long-term survival of the  
677 bacterium (59, 60). Further research into the role of PTS in pyruvate metabolism  
678 and its ecological impact to oral bacteria could reveal novel understandings in  
679 mechanisms that contribute to microbial homeostasis and oral health. Such

680 knowledge of fundamental differences in the metabolism of carbohydrates by  
681 commensals and caries pathogens could be applied to promote health-  
682 associated biofilm communities.

683

## 684 **Materials and methods**

685 **Bacterial strains and culture conditions.** Three different stocks of *S. sanguinis*  
686 SK36 and their mutant derivatives, and *S. mutans* strain UA159 (Table 1) were  
687 maintained on BHI (Difco Laboratories, Detroit, MI) agar plates or Tryptone-yeast  
688 extract (TY, 3% Tryptone and 0.5% yeast extract) agar plates, each  
689 supplemented with 50 mM potassium phosphate, pH 7.2. Antibiotics including  
690 kanamycin (Km, 1 mg/mL), erythromycin (Em, 10 µg/mL), and spectinomycin  
691 (Sp, 1 mg/mL) were used in agar plates for the purpose of selecting for antibiotic-  
692 resistant transformants. BHI liquid medium was routinely used for preparation of  
693 batch starter cultures, which were then diluted into BHI, TY, or the chemically-  
694 defined medium FMC (61) modified to contain various carbohydrates at specified  
695 amounts. Cultures on the agar plates were incubated at 37°C in an aerobic  
696 environment with 5% CO<sub>2</sub>. Bacterial cultures were harvested at specified growth  
697 phases by centrifugation at 15,000 × *g* at 4°C for 10 min, or at room temperature  
698 for 2 min. The cells or the supernates were used immediately for biochemical  
699 reactions or stored at -80°C. For the purpose of studying growth characteristics,  
700 bacterial starter cultures were diluted into FMC or TY containing various  
701 carbohydrates and loaded onto a Bioscreen C system, where wells were overlaid  
702 with mineral oil, and cultures were maintained at 37°C.

703 Chromosomal DNA was extracted from bacterial cells using a Wizard Genomic  
704 DNA purification kit (Promega, Madison, WI), and submitted to MiGS (Microbial  
705 Genome Sequencing Center, Pittsburgh, PA; <https://www.migscenter.com/>) for  
706 WGS (Illumina) analysis and variant calling (Table S1). The coverage of these  
707 WGS genomes ranged between 40- to 50- fold. The high-throughput data of the  
708 genomic sequence of ATCC BAA-1455 (MMZ1922) were deposited in the  
709 Sequence Read Archive (SRA) and assigned an accession number  
710 PRJNA726918 (more information is available from the corresponding author  
711 upon request). To analyze the phylogenetic relationship of BAA-1455 with other  
712 streptococci, a multi-locus sequence typing (MLST) was performed using the  
713 genomes of *S. sanguinis* SK36 and *S. mutans* UA159 from GenBank, the ABySS  
714 assembly (14 Contigs) of MMZ1922 (62), along with the genomes of 25 low-  
715 passage *S. sanguinis* isolates and numerous clinical isolates of other  
716 streptococci obtained from our latest research (40).

717

718 **Construction of deletion mutants and complementing derivatives.** An allelic  
719 exchange strategy (63) was modified to allow easy replacement of the target  
720 gene, e.g., *manL*, with multiple antibiotic markers (knockouts), and for the  
721 purpose of genetic complementation (*manLComp*), knocking-in of the wild-type  
722 gene (*manL*) in place of the antibiotic marker at the original site (26). Each  
723 recombinant event was facilitated by transformation of naturally competent  
724 bacterium using a linear DNA comprised of two homologous fragments, each at  
725 least 1 kbp in length, flanking an antibiotic marker (for knockouts) or a wild-type



726 copy of *manL* sequence followed by a different antibiotic marker (for knock-ins).  
727 For the amplification of the upper flanking fragment, a 27-nucleotide sequence  
728 (sequence A) was added to the front of the regular reverse primer (Table S2,  
729 underlined in primer Ssa1918-2GA); and for the lower flanking fragment, a 30-  
730 nucleotide sequence (sequence B) was added to the front of the regular forward  
731 primer (underlined in primer Ssa1918-3GA). For PCR-amplification of antibiotic  
732 markers, including Km, Em and Sp, specific primers were designed for the  
733 integration of sequences A and B into the 5'- and 3'- ends, respectively, of each  
734 fragment (Table S2, labelled as "Marker for GA"). A mutator DNA for knockouts  
735 was created from two flanking DNA fragments and an antibiotic marker of choice,  
736 each at approximately 100 ng, using a 12- $\mu$ L Gibson Assembly (GA) reaction  
737 (purchased from NEB or prepared in house) by incubation at 50°C for 1 h.  
738 Competent bacterial cells were induced by the use of a synthetic competence-  
739 stimulating peptide (CSP, by ICBR at the University of Florida) previously  
740 identified for *S. sanguinis* (64).

741 For complementation via knocking-in, a different "-2GA" primer  
742 (Ssa1918\_*manL*\_Comp-2GA) was designed and used together with the original  
743 forward primer (Ssa1918-1), so that the upper fragment now contained the wild-  
744 type gene in addition to the flanking sequence, ending with the same overlapping  
745 sequence A. This new fragment, the original lower fragment and an antibiotic  
746 marker of choice (different from the one replacing *manL*) were then ligated  
747 together via GA reaction to create a DNA to restore a wild-type *manL* operon.

748 Each strain was confirmed by PCR using two outmost primers (with names  
749 ending in “-1” and “-4”; Table S2), followed by Sanger sequencing to ensure that  
750 no mutations were introduced into the target or flanking sequences. The primers  
751 used in sequencing, GA-Seq-5’ and GA-Seq-3’, were derived from the sequences  
752 A and B, respectively, each facing outward from the antibiotic marker, thus can  
753 be used for all mutants constructed the same way.

754

755 **PTS assay and pH drop.** The capacity of the bacterium to transport  
756 carbohydrates and to lower environmental pH as a result of carbohydrate  
757 fermentation was assessed using the PTS assay (65, 66) or a pH drop assay,  
758 respectively, as previously described (39, 66).

759

760 **RNA extraction and RT-qPCR.** Bacterial cultures (5 to 10 mL) from mid-  
761 exponential phase ( $OD_{600} = 0.5-0.6$ ) were harvested and treated with RNAprotect  
762 reagent (Qiagen, Germantown, MD), and the cell pellet, if not immediately  
763 processed, was stored at  $-20^{\circ}\text{C}$ . Bacterial cells were resuspended in a lysis  
764 buffer (Qiagen), together with an equal volume of acidic phenol and similar  
765 volume of glass beads, and disrupted by beadbeating for 1 min. After 10 min of  
766 centrifugation at  $15,000\times g$  at room temperature, the clarified aqueous layer was  
767 removed and processed using an RNeasy mini kit (Qiagen) for extraction of total  
768 RNA. While loaded on membrane of the centrifugal column, the RNA sample was  
769 treated with RNase-free DNase I solution (Qiagen), twice, to remove genomic  
770 DNA contamination.

771 To synthesize cDNA, 0.5 µg of each RNA sample was used in a 10-µL reverse  
772 transcription reaction set up using the iScript Select cDNA synthesis kit (Bio-  
773 Rad), together with gene-specific reverse primers (Table S2) used at 200 nM  
774 each. Primer for the housekeeping gene *gyrA* was used as an internal control in  
775 all cases (67). After a 10-fold dilution with water, the cDNA was used as a  
776 template in a quantitative PCR (qPCR) reaction prepared using a SsoAdvanced  
777 Universal SYBR Green Supermix and cycled on a CFX96 Real-Time PCR  
778 Detection System (Bio-Rad), following the supplier's instructions. Each strain was  
779 represented by three biological replicates and each cDNA sample was assayed  
780 at least twice in the qPCR reaction. The relative abundance of each mRNA was  
781 calculated against the housekeeping gene using a  $\Delta\Delta Cq$  method (68).

782

783 **H<sub>2</sub>O<sub>2</sub> measurement and plate-based competition assay.** The relative capacity  
784 of each strain to produce H<sub>2</sub>O<sub>2</sub> and to compete against *S. mutans* was studied by  
785 following previously published protocols with minor changes. H<sub>2</sub>O<sub>2</sub> production  
786 was assessed using an indicator agar plate on the basis of Prussian blue  
787 formation (21, 28). Briefly, a tryptone (3%)-yeast extract (0.5%) agar (1.5%) base  
788 was prepared with the addition of FeCl<sub>3</sub>.6H<sub>2</sub>O (0.1%) and potassium  
789 hexacyanoferrate (III) (0.1%). After autoclaving, glucose or other carbohydrates  
790 were added at the specified amounts before pouring plates. Each strain was  
791 cultivated overnight in BHI medium and dropped onto the agar surface, then  
792 incubated for >20 h to allow bacterial growth and development of Prussian blue  
793 precipitation. Each strain was tested at least three times, with 2 plates each time.

794 Plate-based inhibition assays (42) were carried out to test the interactions  
795 between *S. sanguinis* and *S. mutans* UA159 on various carbohydrate sources  
796 using TY-agar as the base medium. Overnight cultures of *S. sanguinis* strains  
797 were dropped onto the agar first, incubated for 24 h at 37°C in a 5% CO<sub>2</sub> aerobic  
798 incubator, followed by spotting of *S. mutans* UA159 in close proximity to the *S.*  
799 *sanguinis* colony. Plates were incubated for another day before photographing.  
800 Each interaction was tested at least three times.

801

802 **Lactate and pyruvate measurement.** Bacterial cultures were prepared by  
803 diluting overnight BHI cultures at 1:50 into TY medium supplemented with 20 mM  
804 glucose, then incubated at 37°C in an aerobic incubator maintained with 5% CO<sub>2</sub>.  
805 At the specified time or phase of growth, aliquots of bacterial cultures were taken  
806 for optical density measurement (OD<sub>600</sub>), or spun down using a tabletop  
807 centrifuge (14,000× *g*, 2 min), with supernates being removed for assays or  
808 stored at -20°C. Lactate levels in the culture supernates were measured using a  
809 lactate assay kit (LSBio, Seattle, WA), following the protocols provided by the  
810 supplier.

811 To measure pyruvate levels in the same cultures, we adopted an LDH-  
812 catalyzed reaction that coupled the reduction of pyruvate with the oxidation of  
813 NADH with monitoring of the optical density at 340 nm (OD<sub>340</sub>). The assay was  
814 performed by mixing 10 µL sample and 90 µL of enzyme solution, which included  
815 10 Units/mL of lactate dehydrogenase (Sigma) and 100 µM NADH in a 100 mM  
816 sodium-potassium phosphate buffer (pH 7.2) supplemented with 5 mM MgCl<sub>2</sub>.

817 The reaction was incubated at room temperature for 10 min before spectrometry,  
818 with the light source set at UV range. To rule out the influence to the assay by  
819 background NADH-oxidizing activities in bacterial cultures, a control without  
820 addition of LDH was included for each sample. A sodium pyruvate standard in  
821 the range of 0.05 to 0.6 mM was prepared freshly in TY base medium. The final  
822 measurements of pyruvate concentration were normalized against the optical  
823 density (OD<sub>600</sub>) of each culture. An earlier approach (69) to quantifying pyruvate  
824 using a commercial kit was not used due to the presence in samples of H<sub>2</sub>O<sub>2</sub> that  
825 interferes with the reaction. Collection of saliva was carried out according to an  
826 established procedure (IRB201500497 at University of Florida) described  
827 elsewhere (42).

828

## 829 **Acknowledgements**

830 This work was supported by DE12236 from the United States National Institute of  
831 Dental and Craniofacial Research. We thank Dr. Jacqueline Abranches for  
832 providing a subset of the clinical isolates of oral streptococci used in this study.

833

## 834 **References**

- 835 1. Takahashi N, Nyvad B. 2011. The role of bacteria in the caries process:  
836 ecological perspectives. *J Dent Res* 90:294-303.
- 837 2. Beighton D. 2005. The complex oral microflora of high-risk individuals and  
838 groups and its role in the caries process. *Community Dent Oral Epidemiol*  
839 33:248-55.

- 840 3. Peterson SN, Snedrud E, Liu J, Ong AC, Kilian M, Schork NJ, Bretz W.  
841 2013. The dental plaque microbiome in health and disease. PLoS One  
842 8:e58487.
- 843 4. Liu YL, Nascimento M, Burne RA. 2012. Progress toward understanding  
844 the contribution of alkali generation in dental biofilms to inhibition of dental  
845 caries. Int J Oral Sci 4:135-40.
- 846 5. Cheng X, Redanz S, Cullin N, Zhou X, Xu X, Joshi V, Koley D, Merritt J,  
847 Kreth J. 2018. Plasticity of the pyruvate node modulates hydrogen  
848 peroxide production and acid tolerance in multiple oral Streptococci. Appl  
849 Environ Microbiol 84.
- 850 6. Kreth J, Zhang Y, Herzberg MC. 2008. Streptococcal antagonism in oral  
851 biofilms: *Streptococcus sanguinis* and *Streptococcus gordonii* interference  
852 with *Streptococcus mutans*. J Bacteriol 190:4632-40.
- 853 7. Redanz S, Cheng X, Giacaman RA, Pfeifer CS, Merritt J, Kreth J. 2018.  
854 Live and let die: Hydrogen peroxide production by the commensal flora  
855 and its role in maintaining a symbiotic microbiome. Mol Oral Microbiol  
856 33:337-352.
- 857 8. Zeng L, Dong Y, Burne RA. 2006. Characterization of *cis*-acting sites  
858 controlling arginine deiminase gene expression in *Streptococcus gordonii*.  
859 J Bacteriol 188:941-9.
- 860 9. Postma PW, Lengeler JW, Jacobson GR. 1993.  
861 Phosphoenolpyruvate:carbohydrate phosphotransferase systems of  
862 bacteria. Microbiol Rev 57:543-94.

- 863 10. Garvie EI. 1980. Bacterial lactate dehydrogenases. *Microbiol Rev* 44:106-  
864 39.
- 865 11. Ritchey TW, Seely HW, Jr. 1976. Distribution of cytochrome-like  
866 respiration in streptococci. *J Gen Microbiol* 93:195-203.
- 867 12. Willenborg J, Goethe R. 2016. Metabolic traits of pathogenic streptococci.  
868 *FEBS Lett* 590:3905-3919.
- 869 13. Burne RA. 1998. Oral streptococci... products of their environment. *J Dent*  
870 *Res* 77:445-52.
- 871 14. Kreth J, Giacaman RA, Raghavan R, Merritt J. 2017. The road less  
872 traveled - defining molecular commensalism with *Streptococcus sanguinis*.  
873 *Mol Oral Microbiol* 32:181-196.
- 874 15. Kilian M, Mikkelsen L, Henrichsen J. 1989. Taxonomic study of Viridans  
875 Streptococci: Description of *Streptococcus gordonii* sp. nov. and emended  
876 descriptions of *Streptococcus sanguis* (White and Niven 1946),  
877 *Streptococcus oralis* (Bridge and Sneath 1982), and *Streptococcus mitis*  
878 (Andrewes and Horder 1906). *International Journal of Systematic and*  
879 *Evolutionary Microbiology* 39:471-484.
- 880 16. Valdebenito B, Tullume-Vergara PO, González W, Kreth J, Giacaman RA.  
881 2018. *In silico* analysis of the competition between *Streptococcus*  
882 *sanguinis* and *Streptococcus mutans* in the dental biofilm. *Molecular Oral*  
883 *Microbiology* 33:168-180.
- 884 17. Xu P, Alves JM, Kitten T, Brown A, Chen Z, Ozaki LS, Manque P, Ge X,  
885 Serrano MG, Puiu D, Hendricks S, Wang Y, Chaplin MD, Akan D, Paik S,

- 886 Peterson DL, Macrina FL, Buck GA. 2007. Genome of the opportunistic  
887 pathogen *Streptococcus sanguinis*. J Bacteriol 189:3166-3175.
- 888 18. Bai Y, Shang M, Xu M, Wu A, Sun L, Zheng L. 2019. Transcriptome,  
889 phenotypic, and virulence analysis of *Streptococcus sanguinis* SK36 wild  
890 type and its CcpA-null derivative ( $\Delta$ CcpA). Front Cell Infect Microbiol  
891 9:411.
- 892 19. Gorke B, Stulke J. 2008. Carbon catabolite repression in bacteria: many  
893 ways to make the most out of nutrients. Nat Rev Microbiol 6:613-24.
- 894 20. Redanz S, Masilamani R, Cullin N, Giacaman RA, Merritt J, Kreth J. 2018.  
895 Distinct regulatory role of carbon catabolite protein A (CcpA) in oral  
896 streptococcal *spxB* expression. J Bacteriol 200.
- 897 21. Redanz S, Treerat P, Mu R, Redanz U, Zou Z, Koley D, Merritt J, Kreth J.  
898 2020. Pyruvate secretion by oral streptococci modulates hydrogen  
899 peroxide dependent antagonism. Isme j 14:1074-1088.
- 900 22. Zeng L, Burne RA. 2020. Molecular mechanisms controlling fructose-  
901 specific memory and catabolite repression in lactose metabolism by  
902 *Streptococcus mutans*. Mol Microbiol n/a:70-83.
- 903 23. Vadeboncoeur C, Pelletier M. 1997. The phosphoenolpyruvate:sugar  
904 phosphotransferase system of oral streptococci and its role in the control  
905 of sugar metabolism. FEMS Microbiol Rev 19:187-207.
- 906 24. Taylor DE. 1999. Bacterial tellurite resistance. Trends Microbiol 7:111-5.



- 907 25. Dong Y, Chen YY, Burne RA. 2004. Control of expression of the arginine  
908 deiminase operon of *Streptococcus gordonii* by CcpA and Flp. J Bacteriol  
909 186:2511-4.
- 910 26. Zheng L, Chen Z, Itzek A, Ashby M, Kreth J. 2011. Catabolite control  
911 protein A controls hydrogen peroxide production and cell death in  
912 *Streptococcus sanguinis*. J Bacteriol 193:516-26.
- 913 27. Burne RA, Marquis RE. 2000. Alkali production by oral bacteria and  
914 protection against dental caries. FEMS Microbiol Lett 193:1-6.
- 915 28. Saito M, Seki M, Iida K-i, Nakayama H, Yoshida S-i. 2007. A novel agar  
916 medium to detect hydrogen peroxide-producing bacteria Based on the  
917 prussian blue-forming reaction. Microbiology and Immunology 51:889-892.
- 918 29. Kajfasz JK, Zuber P, Ganguly T, Abranches J, Lemos JA. 2021. Increased  
919 oxidative stress tolerance of a spontaneously-occurring *perR* gene  
920 mutation in *Streptococcus mutans* UA159. J Bacteriol  
921 doi:10.1128/jb.00535-20.
- 922 30. Abranches J, Chen YY, Burne RA. 2003. Characterization of  
923 *Streptococcus mutans* strains deficient in EIIAB<sup>Man</sup> of the sugar  
924 phosphotransferase system. Appl Environ Microbiol 69:4760-9.
- 925 31. Moye ZD, Burne RA, Zeng L. 2014. Uptake and metabolism of N-  
926 acetylglucosamine and glucosamine by *Streptococcus mutans*. Appl  
927 Environ Microbiol 80:5053-67.

- 928 32. Zeng L, Das S, Burne RA. 2010. Utilization of lactose and galactose by  
929 *Streptococcus mutans*: transport, toxicity, and carbon catabolite  
930 repression. *J Bacteriol* 192:2434-44.
- 931 33. Iwami Y, Abbe K, Takahashi-Abbe S, Yamada T. 1992. Acid production by  
932 streptococci growing at low pH in a chemostat under anaerobic conditions.  
933 *Oral Microbiol Immunol* 7:304-8.
- 934 34. Xiao Z, Xu P. 2007. Acetoin metabolism in bacteria. *Crit Rev Microbiol*  
935 33:127-40.
- 936 35. Zheng LY, Itzek A, Chen ZY, Kreth J. 2011. Oxygen dependent pyruvate  
937 oxidase expression and production in *Streptococcus sanguinis*. *Int J Oral*  
938 *Sci* 3:82-9.
- 939 36. Ge X, Yu Y, Zhang M, Chen L, Chen W, Elrami F, Kong F, Kitten T, Xu P.  
940 2016. Involvement of NADH oxidase in competition and endocarditis  
941 virulence in *Streptococcus sanguinis*. *Infect Immun* 84:1470-1477.
- 942 37. Ahn SJ, Deep K, Turner ME, Ishkov I, Waters A, Hagen SJ, Rice KC.  
943 2019. Characterization of LrgAB as a stationary phase-specific pyruvate  
944 uptake system in *Streptococcus mutans*. *BMC Microbiol* 19:223.
- 945 38. Kreth J, Vu H, Zhang Y, Herzberg MC. 2009. Characterization of hydrogen  
946 peroxide-induced DNA release by *Streptococcus sanguinis* and  
947 *Streptococcus gordonii*. *J Bacteriol* 191:6281-91.
- 948 39. Bender GR, Sutton SV, Marquis RE. 1986. Acid tolerance, proton  
949 permeabilities, and membrane ATPases of oral streptococci. *Infect Immun*  
950 53:331-338.

- 951 40. Velsko IM, Chakraborty B, Nascimento MM, Burne RA, Richards VP.  
952 2018. Species designations belie phenotypic and genotypic heterogeneity  
953 in oral streptococci. *mSystems* 3:e00158-18.
- 954 41. Garcia BA, Acosta NC, Tomar SL, Roesch LFW, Lemos JA, Mugayar  
955 LCF, Abranches J. 2021. Association of *Streptococcus mutans* harboring  
956 bona-fide collagen binding proteins and *Candida albicans* with early  
957 childhood caries recurrence. medRxiv  
958 doi:10.1101/2021.02.28.21252629:2021.02.28.21252629.
- 959 42. Chen L, Chakraborty B, Zou J, Burne RA, Zeng L. 2019. Amino sugars  
960 modify antagonistic interactions between commensal oral Streptococci  
961 and *Streptococcus mutans*. *Appl Environ Microbiol* 85:e00370-19.
- 962 43. Svensäter G, Borgström M, Bowden GH, Edwardsson S. 2003. The acid-  
963 tolerant microbiota associated with plaque from initial caries and healthy  
964 tooth surfaces. *Caries Res* 37:395-403.
- 965 44. Marsh PD, Mcdermid AS, Keevil CW, Ellwood DC. 1985. Environmental  
966 regulation of carbohydrate metabolism by *Streptococcus sanguis* NCTC  
967 7865 grown in a chemostat. *Microbiology* 131:2505-2514.
- 968 45. Zeng L, Martino NC, Burne RA. 2012. Two gene clusters coordinate  
969 galactose and lactose metabolism in *Streptococcus gordonii*. *Appl Environ*  
970 *Microbiol* 78:5597-605.
- 971 46. Ramírez-Nuñez J, Romero-Medrano R, Nevárez-Moorillón GV, Gutiérrez-  
972 Méndez N. 2011. Effect of pH and salt gradient on the autolysis of  
973 *Lactococcus lactis* strains. *Braz J Microbiol* 42:1495-9.

- 974 47. Vilhena C, Kaganovitch E, Grünberger A, Motz M, Forné I, Kohlheyer D,  
975 Jung K. 2019. Importance of pyruvate sensing and transport for the  
976 resuscitation of viable but nonculturable *Escherichia coli* K-12. *J Bacteriol*  
977 201.
- 978 48. Wu J, Li Y, Cai Z, Jin Y. 2014. Pyruvate-associated acid resistance in  
979 bacteria. *Appl Environ Microbiol* 80:4108-13.
- 980 49. Ahn SJ, Hull W, Desai S, Rice KC, Culp D. 2020. Understanding LrgAB  
981 regulation of *Streptococcus mutans* metabolism. *Front Microbiol* 11:2119.
- 982 50. Pfeiffer T, Morley A. 2014. An evolutionary perspective on the Crabtree  
983 effect. *Front Mol Biosci* 1:17.
- 984 51. Deutscher J. 2008. The mechanisms of carbon catabolite repression in  
985 bacteria. *Curr Opin Microbiol* 11:87-93.
- 986 52. Fleming E, Lazinski DW, Camilli A. 2015. Carbon catabolite repression by  
987 seryl phosphorylated HPr is essential to *Streptococcus pneumoniae* in  
988 carbohydrate-rich environments. *Mol Microbiol* 97:360-80.
- 989 53. Tong H, Zeng L, Burne RA. 2011. The EIIAB<sup>Man</sup> PTS permease regulates  
990 carbohydrate catabolite repression in *Streptococcus gordonii*. *Appl*  
991 *Environ Microbiol* 77:1957-65.
- 992 54. Zeng L, Burne RA. 2010. Seryl-phosphorylated HPr regulates CcpA-  
993 independent carbon catabolite repression in conjunction with PTS  
994 permeases in *Streptococcus mutans*. *Mol Microbiol* 75:1145-1158.

- 995 55. Ge X, Shi X, Shi L, Liu J, Stone V, Kong F, Kitten T, Xu P. 2016.  
996 Involvement of NADH oxidase in biofilm formation in *Streptococcus*  
997 *sanguinis*. PLoS One 11:e0151142.
- 998 56. Baker JL, Derr AM, Faustoferri RC, Quivey RG, Jr. 2015. Loss of NADH  
999 oxidase activity in *Streptococcus mutans* leads to Rex-mediated  
1000 overcompensation in NAD<sup>+</sup> regeneration by lactate dehydrogenase. J  
1001 Bacteriol 197:3645-57.
- 1002 57. Takahashi N, Washio J, Mayanagi G. 2010. Metabolomics of  
1003 supragingival plaque and oral bacteria. J Dent Res 89:1383-8.
- 1004 58. Gawron K, Wojtowicz W, Lazarz-Bartyzel K, Lamasz A, Qasem B, Mydel  
1005 P, Chomyszyn-Gajewska M, Potempa J, Mlynarz P. 2019. Metabolomic  
1006 status of the oral cavity in chronic periodontitis. In Vivo 33:1165-1174.
- 1007 59. Busuioc M, Buttaro BA, Piggot PJ. 2010. The *pdh* operon is expressed in  
1008 a subpopulation of stationary-phase bacteria and is important for survival  
1009 of sugar-starved *Streptococcus mutans*. J Bacteriol 192:4395-402.
- 1010 60. Korithoski B, Lévesque CM, Cvitkovitch DG. 2008. The involvement of the  
1011 pyruvate dehydrogenase E1alpha subunit, in *Streptococcus mutans* acid  
1012 tolerance. FEMS Microbiol Lett 289:13-9.
- 1013 61. Terleckyj B, Willett NP, Shockman GD. 1975. Growth of several cariogenic  
1014 strains of oral streptococci in a chemically defined medium. Infect Immun  
1015 11:649-55.

- 1016 62. Simpson JT, Wong K, Jackman SD, Schein JE, Jones SJ, Birol I. 2009.  
1017 ABySS: a parallel assembler for short read sequence data. *Genome Res*  
1018 19:1117-23.
- 1019 63. Lau PC, Sung CK, Lee JH, Morrison DA, Cvitkovitch DG. 2002. PCR  
1020 ligation mutagenesis in transformable streptococci: application and  
1021 efficiency. *J Microbiol Methods* 49:193-205.
- 1022 64. Rodriguez AM, Callahan JE, Fawcett P, Ge X, Xu P, Kitten T. 2011.  
1023 Physiological and molecular characterization of genetic competence in  
1024 *Streptococcus sanguinis*. *Mol Oral Microbiol* 26:99-116.
- 1025 65. LeBlanc DJ, Crow VL, Lee LN, Garon CF. 1979. Influence of the lactose  
1026 plasmid on the metabolism of galactose by *Streptococcus lactis*. *J*  
1027 *Bacteriol* 137:878-84.
- 1028 66. Moye ZD, Zeng L, Burne RA. 2014. Modification of gene expression and  
1029 virulence traits in *Streptococcus mutans* in response to carbohydrate  
1030 availability. *Appl Environ Microbiol* 80:972-985.
- 1031 67. Vujanac M, Iyer VS, Sengupta M, Ajdic D. 2015. Regulation of  
1032 *Streptococcus mutans* PTS<sup>Bio</sup> by the transcriptional repressor NigR. *Mol*  
1033 *Oral Microbiol* 30:280-294.
- 1034 68. Schmittgen TD, Livak KJ. 2008. Analyzing real-time PCR data by the  
1035 comparative C<sub>T</sub> method. *Nat Protocols* 3:1101-8.
- 1036 69. Chen L, Walker AR, Burne RA, Zeng L. 2020. Amino sugars reshape  
1037 interactions between *Streptococcus mutans* and *Streptococcus gordonii*.  
1038 *Appl Environ Microbiol* 87:e01459-20.

## 1039 **Figure legends**

1040 **Figure 1.** A *manL* mutant of *S. sanguinis* SK36 had enhanced viability in  
1041 stationary cultures. Wild-type strain SK36 (MMZ1612), the *manL* mutant, and the  
1042 complemented derivative of *manL* (*manLComp*) were (n = 3) cultivated for 20 h in  
1043 BHI before being diluted into fresh BHI (A) or a TY medium containing 20 mM of  
1044 glucose (TYG20) (B), followed by growth monitoring in a Bioscreen system. For  
1045 another set of SK36 samples (SK36 + Kp), 50 mM of potassium phosphate buffer  
1046 (pH 7.2) was added to the overnight cultures. (C) An *in vitro* sugar  
1047 phosphorylation assay was carried out using SK36 and *manL* mutant cultures  
1048 prepared with BHI medium and harvested at the exponential phase. (D) For  
1049 measurements of lactate, overnight cultures were diluted into TY containing  
1050 glucose (Glc) or lactose (Lac), and the supernates were harvested at the  
1051 exponential phase. The results are the averages of three biological replicates  
1052 with error bars denoting standard deviations. Asterisks represent statistical  
1053 significance according to a Student's *t* test (\*,  $P < 0.05$ ; \*\*,  $P < 0.01$ , \*\*\*,  $P < 0.001$ ).

1054

1055 **Figure 2.** pH drop assays. Strains SK36 (MMZ1612), *manL*, and *manLComp*  
1056 were cultured to late exponential phase ( $OD_{600} = 0.8$ ) in 50 mL BHI medium,  
1057 harvested by centrifugation and used immediately for assay (A) or frozen at -  
1058 80°C, and then thawed and assayed at least one day later (B). Each sample was  
1059 washed once with 50 mL cold water, resuspended in a solution containing 50 mL  
1060 KCl and 1 mM  $MgCl_2$ , and normalized to  $OD_{600} = 4.5$ . The assay was initiated by  
1061 the addition of 50 mM glucose and pH was monitored and recorded at 30-s

1062 intervals for at least 40 min. Each curve includes the average and standard  
1063 deviation (error bars) of three biological replicates.

1064

1065 **Figure 3.** Loss of *manL* affects pH homeostasis by changing AD gene  
1066 expression. pH measurements of stationary-phase cultures (20 h) in TY (A, B) or  
1067 BHI (C) media were recorded for strains SK36 (MMZ1612), *manL*, *manLComp*,  
1068 *arcA* and *manL arcA*. For BHI cultures, 0, 1, or 5 mM of arginine was added to  
1069 the medium before cultivation. Data were obtained from three biological  
1070 replicates. (D) RT-qPCR was performed to measure the expression of *arcA* gene  
1071 in exponential-phase cultures prepared in TY containing glucose (Glc) or lactose  
1072 (Lac), or in BHI. The abundance of *arcA* mRNA was calculated relative to an  
1073 internal control (*gyrA*). Three biological replicates were included for each sample  
1074 and the results are their averages and standard deviations (as error bars).

1075

1076 **Figure 4.** H<sub>2</sub>O<sub>2</sub> production (A) and antagonism of *S. mutans* (B) on plates.  
1077 Cultures of SK36 the wild type (strain #1) and its mutant derivatives deficient in  
1078 *manL* (#2), *ccpA* (#3), *manL ccpA* (#4), *nox* (#5), and *manL nox* (#6) were each  
1079 dropped onto the surface of TY-agar plates prepared with 20 mM of glucose,  
1080 lactose, galactose (Gal), GlcN, GlcNAc, or 10 mM each of glucose and galactose  
1081 (Glc/Gal), and incubated for 24 h in an aerobic environment (with 5% CO<sub>2</sub>). (A)  
1082 For direct measurement of H<sub>2</sub>O<sub>2</sub> release, the plates contained 0.1% each of  
1083 FeCl<sub>3</sub>.6H<sub>2</sub>O and potassium hexacyanoferrate(III) which formed a Prussian blue  
1084 zone upon reacting with H<sub>2</sub>O<sub>2</sub>. (B) For antagonism of *S. mutans*, same amount of



1085 UA159 culture (*S. m*) was placed to the right of the first colony, followed by  
1086 another 24 h of incubation. All images were photographed under the same  
1087 setting, with the zones of Prussian blue assessed relative to the size of the  
1088 colonies. Each experiment was repeated three times using biological replicates,  
1089 with a representative result being presented.

1090

1091 **Figure 5.** Measurements of relative mRNA levels of catabolic genes by RT-  
1092 qPCR. Strains SK36, *ccpA*, *manL*, and *manL ccpA* were each cultured, in a TY  
1093 medium containing 20 mM glucose, to exponential phase before harvested for  
1094 RNA extraction. An internal control (*gyrA*) was used to measure the relative  
1095 abundance of each transcript. The results for each gene are presented as the  
1096 average and standard derivation (error bar) of three biological repeats.

1097

1098 **Figure 6.** Deletion of *manL* affects release of pyruvate (A, B, C) and eDNA (D).  
1099 Strains SK36, *manL*, *manLComp*, *ccpA*, and *manL ccpA* were cultured in TY  
1100 medium supplemented with 20 mM of glucose (A, B, C, D) or 10 mM of lactose  
1101 (A). (A) Supernates from stationary-phase (20 h) cultures of all 5 strains were  
1102 used in an LDH-catalyzed reaction to measure the pyruvate levels under glucose  
1103 and lactose conditions. Aliquots of SK36 (B) or the *manL* mutant (C) were taken  
1104 at specified time points for measurements of OD<sub>600</sub> and extracellular pyruvate.  
1105 (D) Supernates from stationary cultures of SK36, *manL*, and *manLComp* were  
1106 measured for DNA concentrations using a fluorescent dye. The relative  
1107 fluorescence units (RFU) are in linear relationship with DNA concentrations

1108 within the experimental range. Each result shows the average of three biological  
1109 repeats, with the error bars denoting standard derivation and asterisks the  
1110 statistical significance according to Student's *t* test (\*\*,  $P < 0.01$ ; \*\*\*,  $P < 0.001$ ).

1111

1112 **Figure 7.** Exogenous pyruvate improves persistence of *S. sanguinis*. *S. mutans*  
1113 UA159 and *S. sanguinis* strains SK36 and its isogenic *manL* mutant were each  
1114 ( $n = 3$ ) cultured overnight in BHI medium supplemented with or without 5 mM of  
1115 pyruvate. The next day, cultures were diluted and plated for viable CFU counts  
1116 (A) or for assessment of growth characteristics (B, C) by diluting into TY-Glc  
1117 medium with or without 5 mM of pyruvate. Panel B shows the effects of pyruvate  
1118 in overnight cultures of UA159 and SK36 by diluting them into TY-Glc without  
1119 pyruvate, and panel C shows the effects of pyruvate added to fresh TY-Glc by  
1120 diluting from overnight cultures prepared without pyruvate. Each of the columns  
1121 and the growth curves represents the average of three biological replicates.  
1122 Asterisks denote the statistical significance ( $P < 0.05$ ) obtained using a Student's *t*  
1123 test.

1124

1125 **Table 1.** Bacterial strains used in this study.

| Strains | Relevant characteristics <sup>a</sup>                | Source or reference |
|---------|------------------------------------------------------|---------------------|
| MMZ1612 | <i>S. sanguinis</i> SK36 stock 1                     | Lemos laboratory    |
| MMZ1896 | <i>S. sanguinis</i> SK36 stock 2                     | Kitten laboratory   |
| MMZ1922 | <i>S. sanguinis</i> SK36 stock 3                     | ATCC BAA-1455       |
| MMZ1616 | SK36 <i>manL::Em</i>                                 | MMZ1612             |
| MMZ1617 | SK36 <i>manL::Km</i>                                 | MMZ1612             |
| MMZ1882 | SK36 <i>manL::Km</i>                                 | MMZ1896             |
| MMZ1923 | SK36 <i>manL::Km</i>                                 | MMZ1922             |
| MMZ1904 | SK36 <i>manLComp::Km</i>                             | MMZ1616             |
| MMZ1905 | SK36 <i>manLComp::Em</i>                             | MMZ1617             |
| MMZ1911 | SK36 <i>arcA::Km</i>                                 | MMZ1896             |
| MMZ1912 | SK36 <i>arcA::Em manL::Km</i>                        | MMZ1617             |
| MMZ1913 | SK36 <i>ccpA::Km</i>                                 | MMZ1896             |
| MMZ1910 | SK36 <i>ccpA::Em manL::Km</i>                        | MMZ1617             |
| MMZ1906 | SK36 <i>nox::Km</i>                                  | MMZ1896             |
| MMZ1907 | SK36 <i>nox::Em manL::Km</i>                         | MMZ1617             |
| UA159   | <i>S. mutans</i> wild type, <i>perR</i> <sup>+</sup> | ATCC 700610         |

1126 <sup>a</sup> *Km* indicates kanamycin resistance; *Em*, erythromycin.

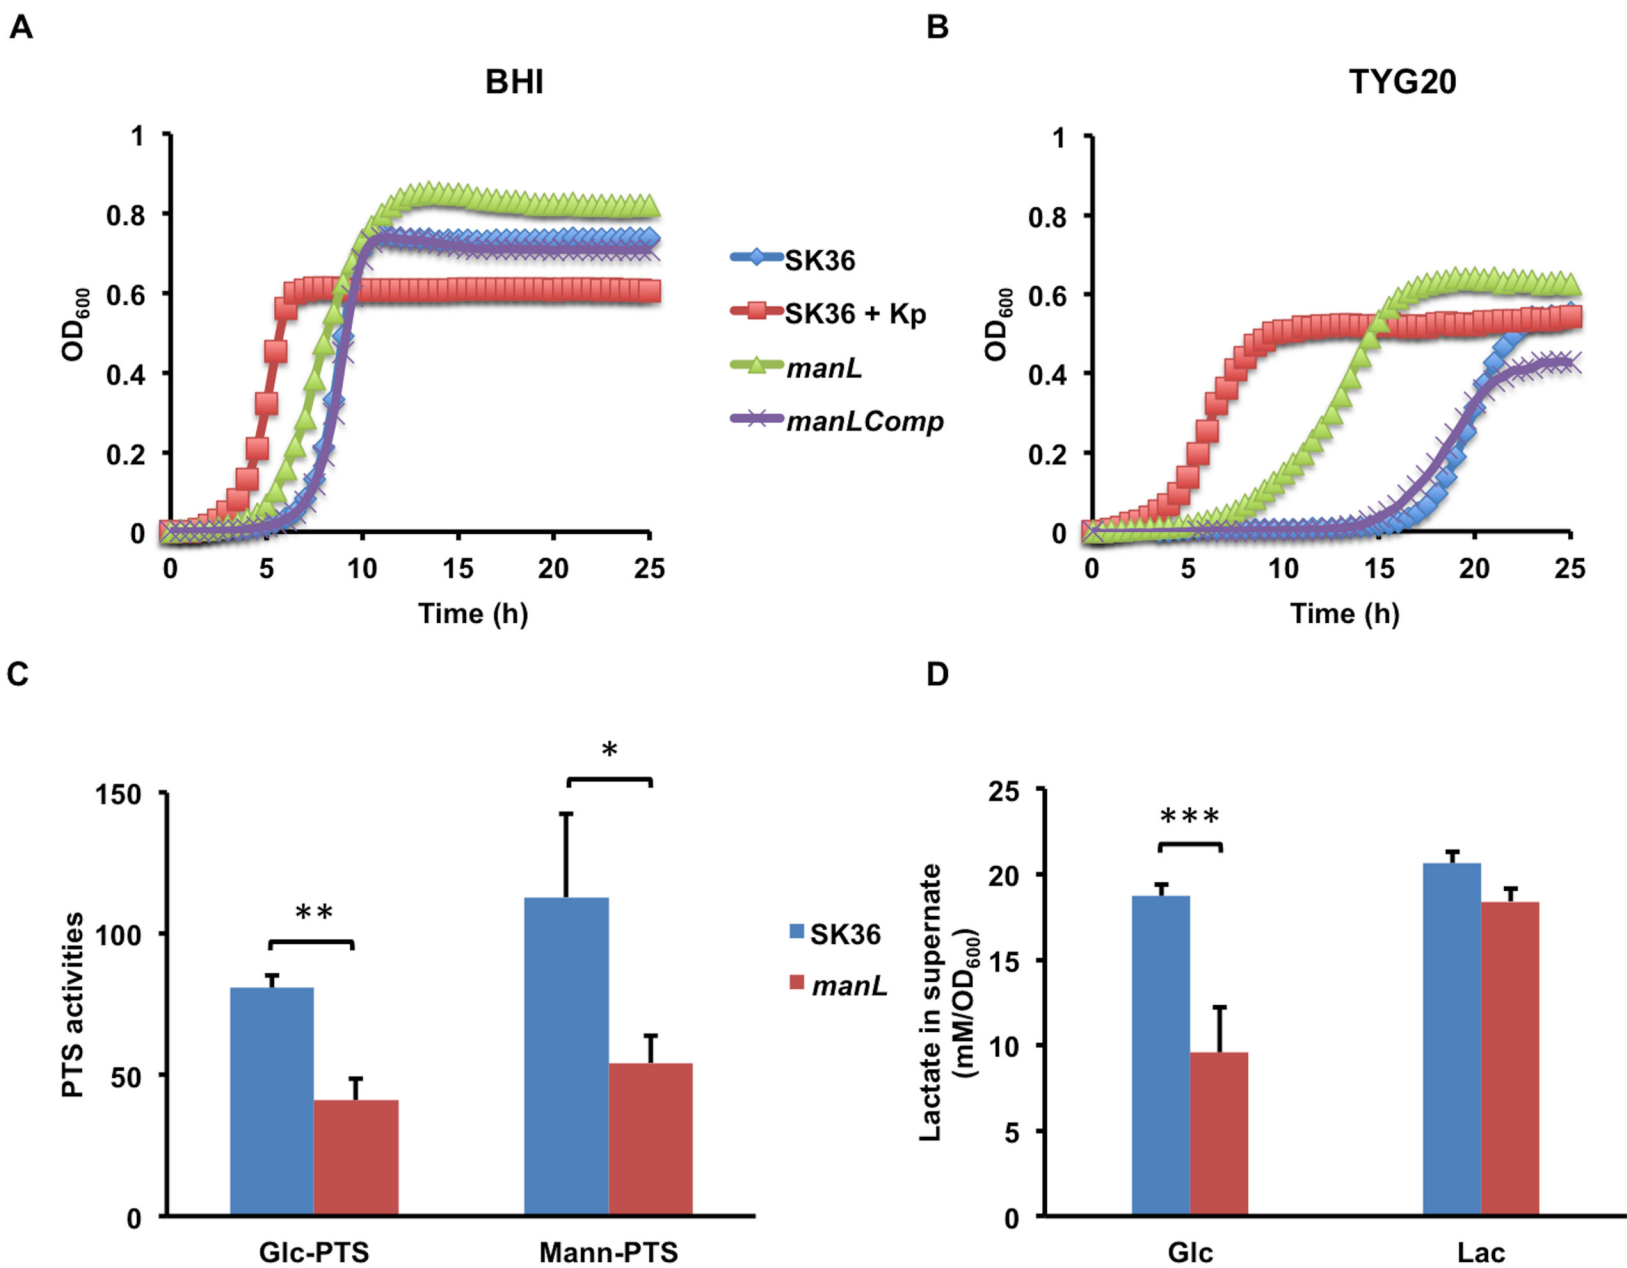

A

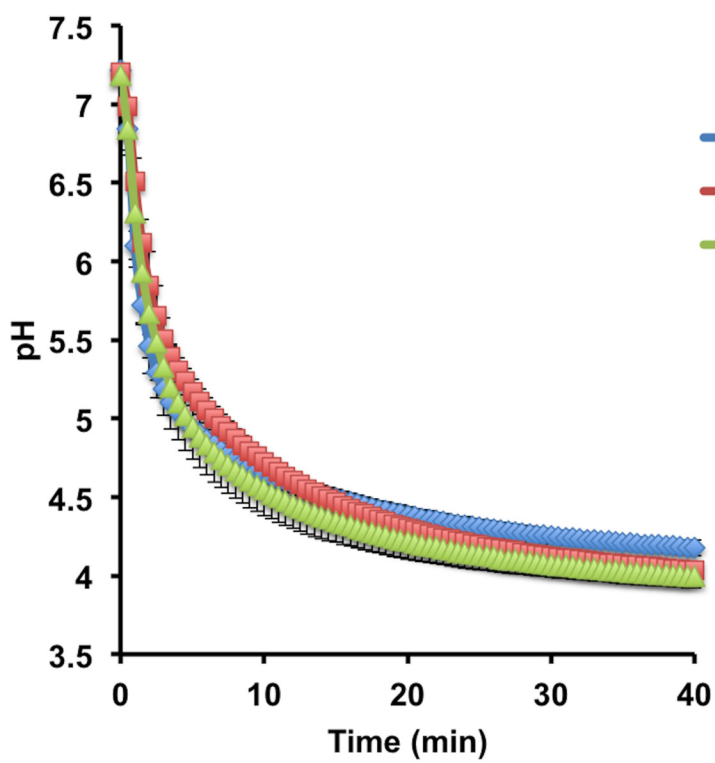

B

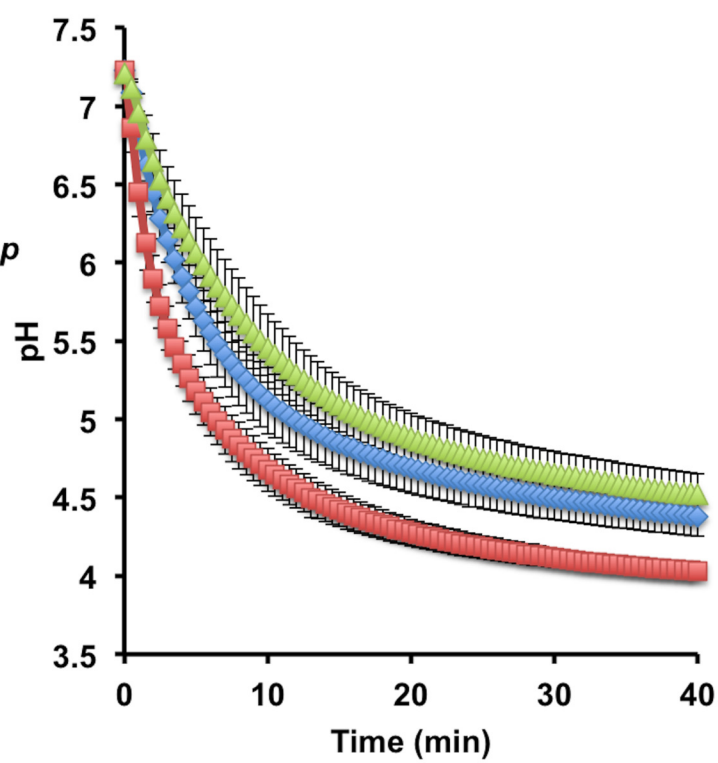

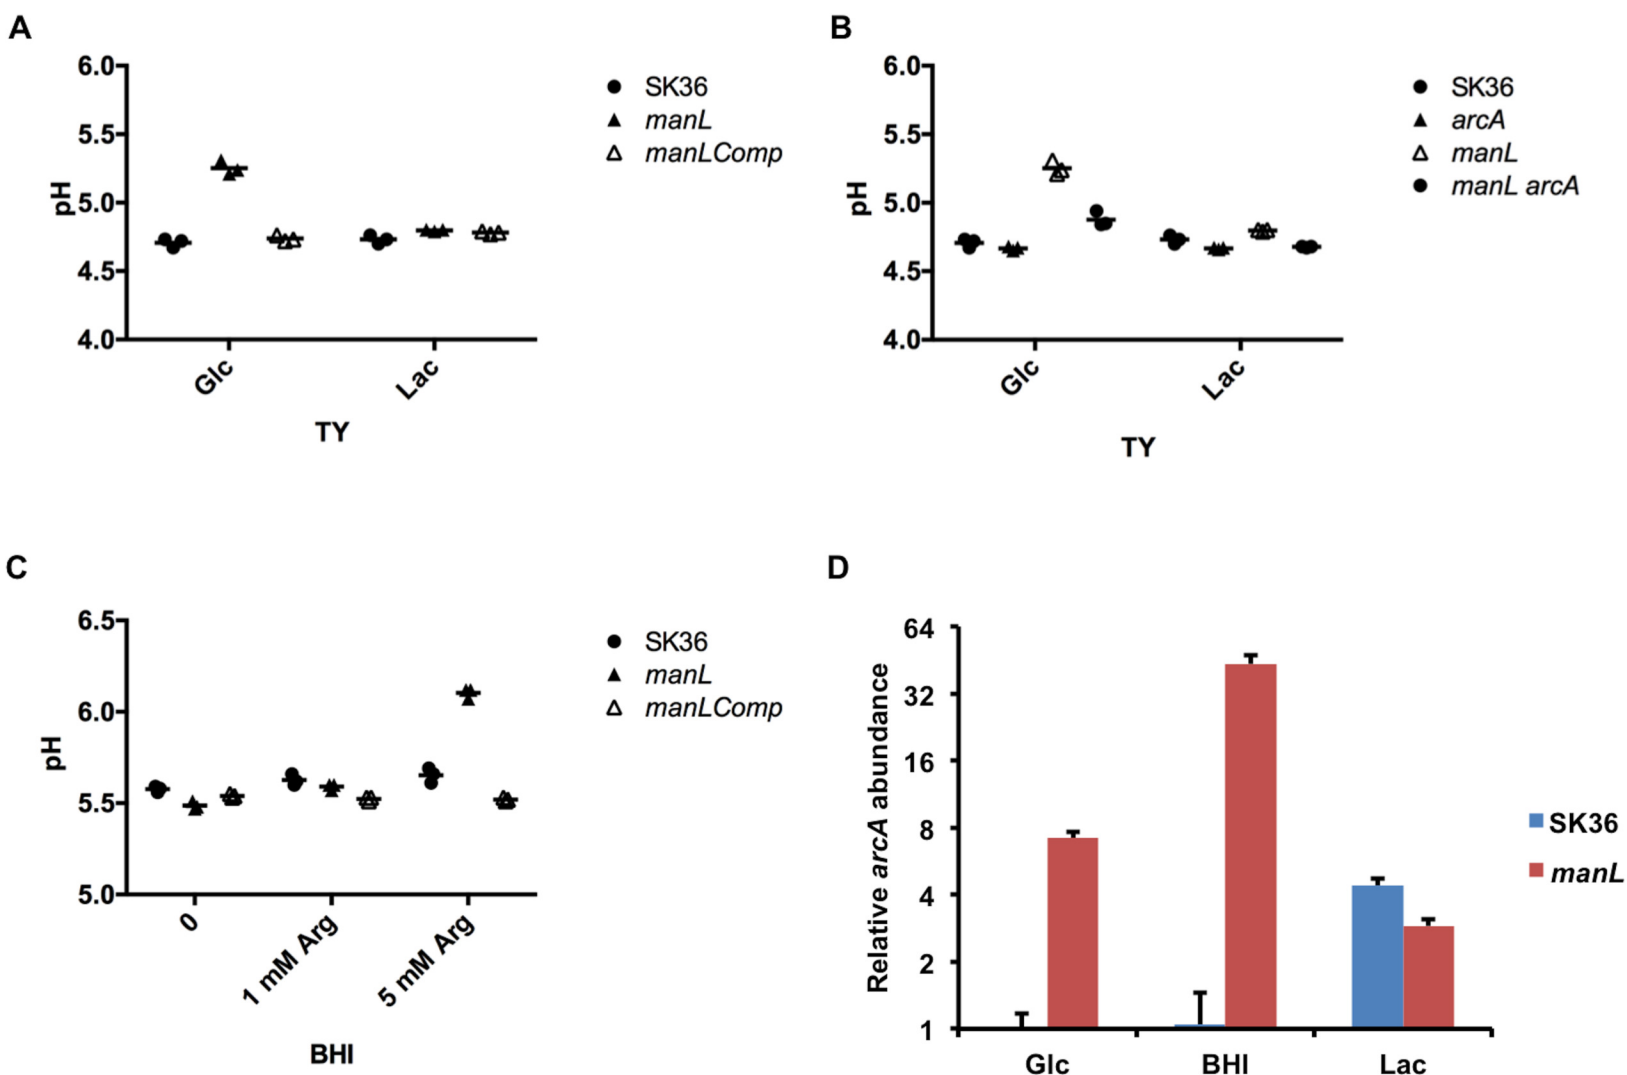

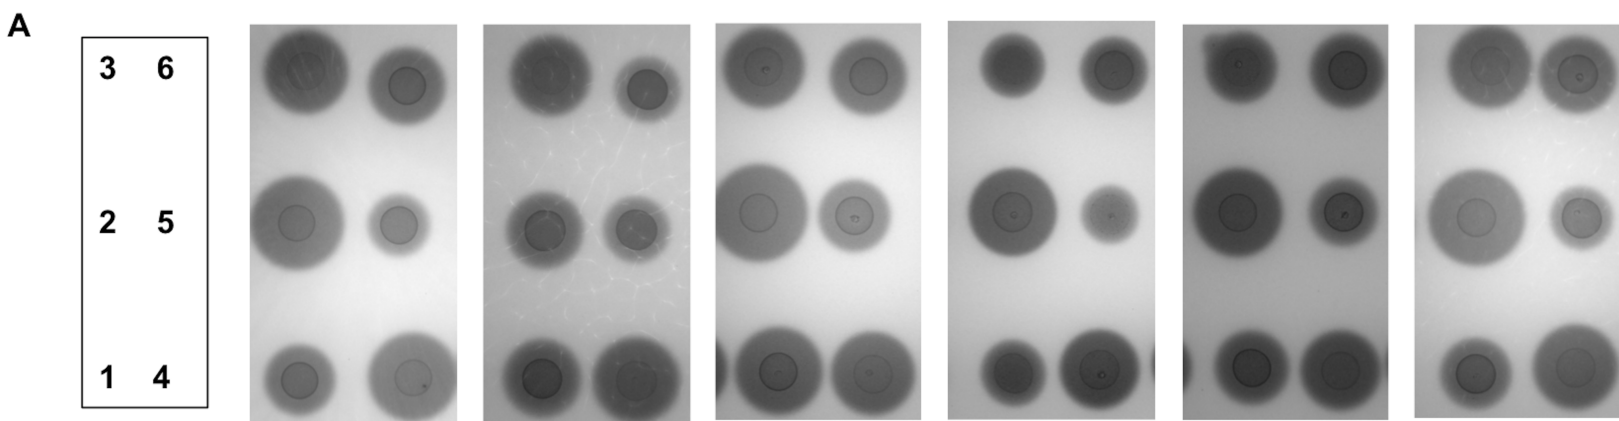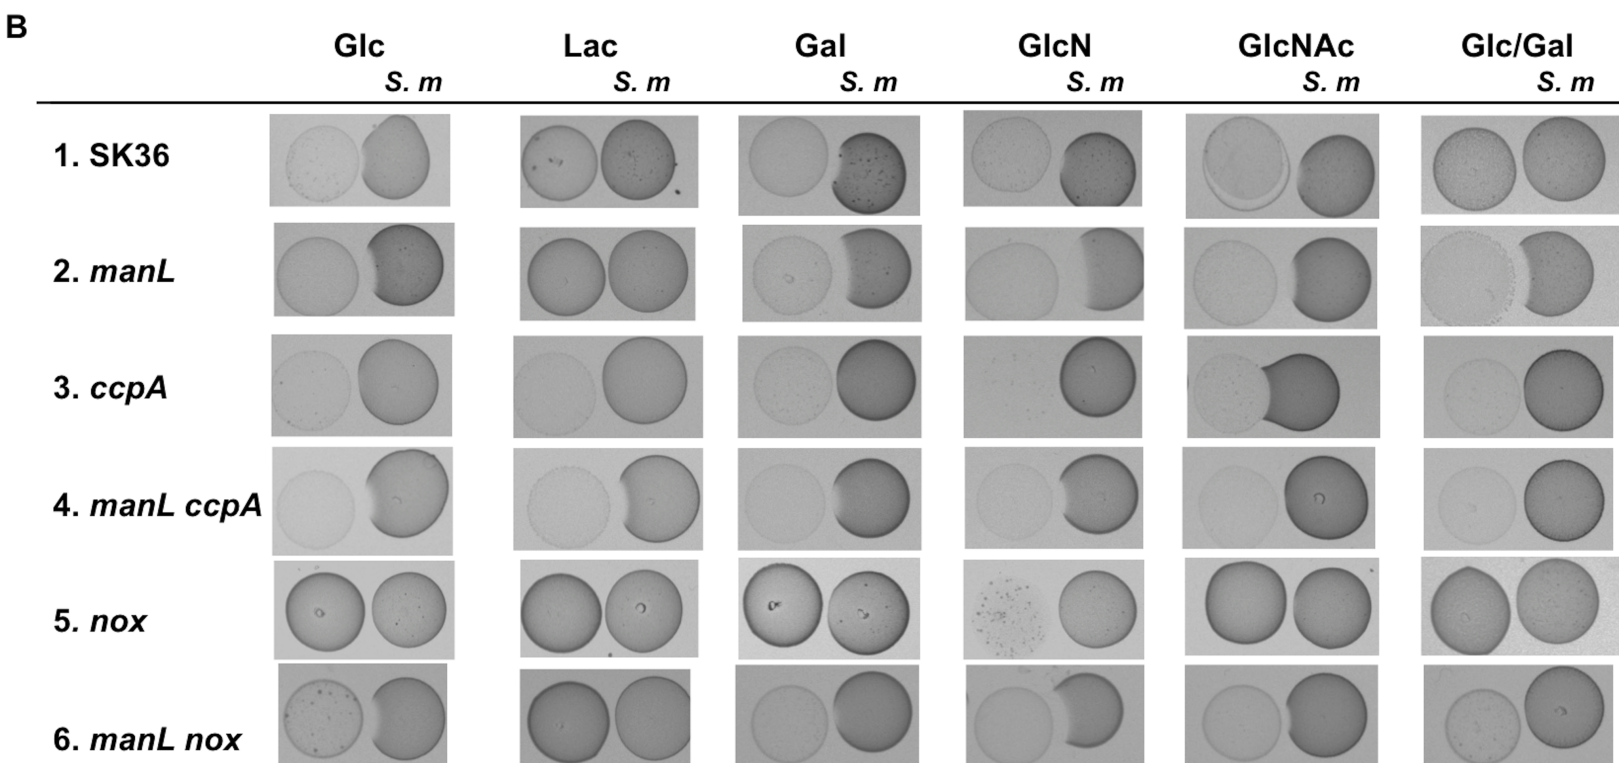

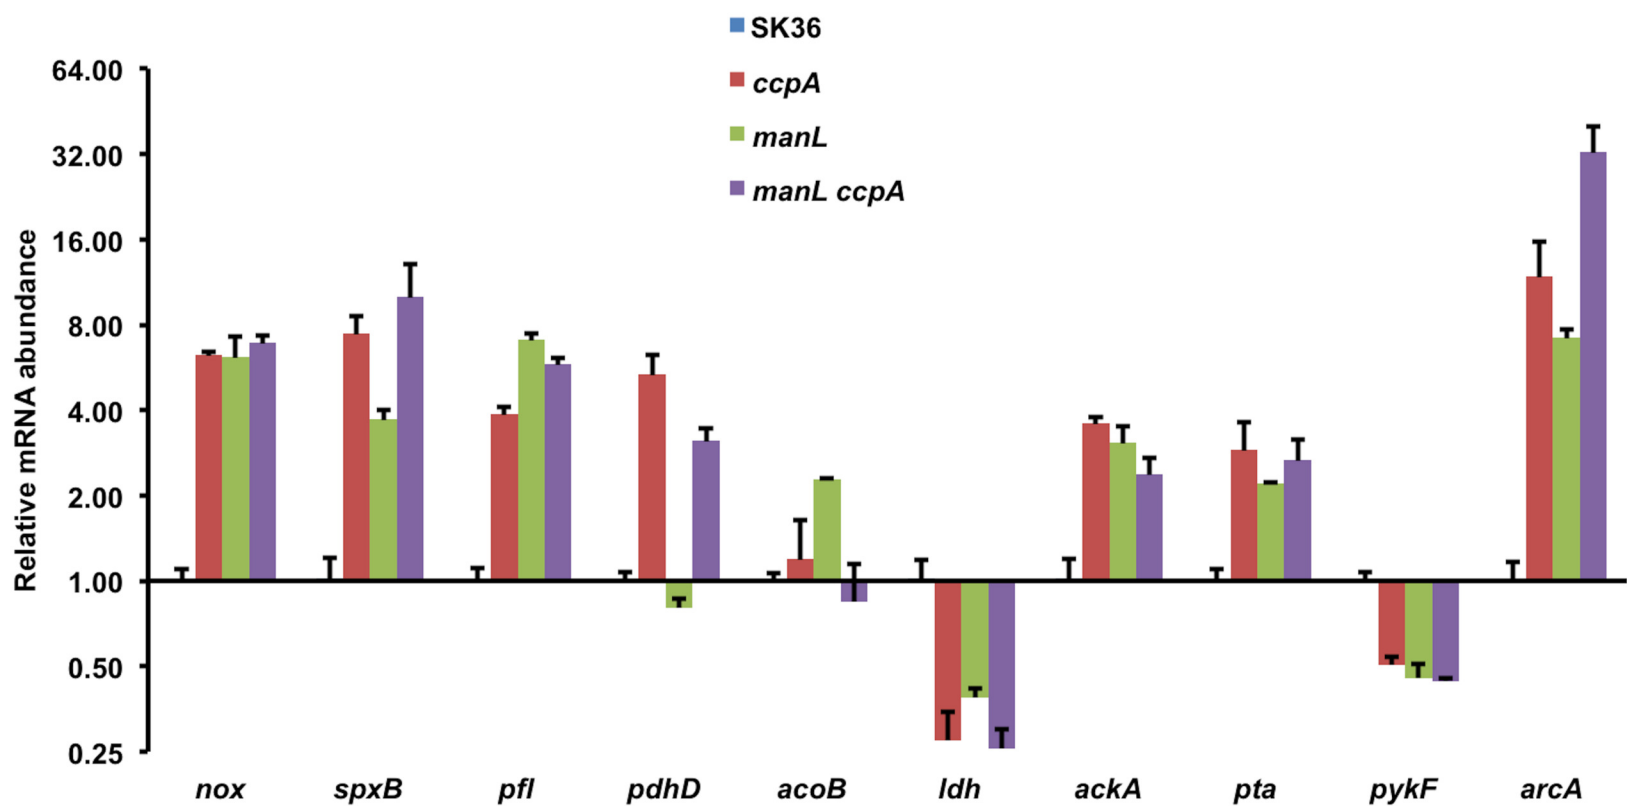



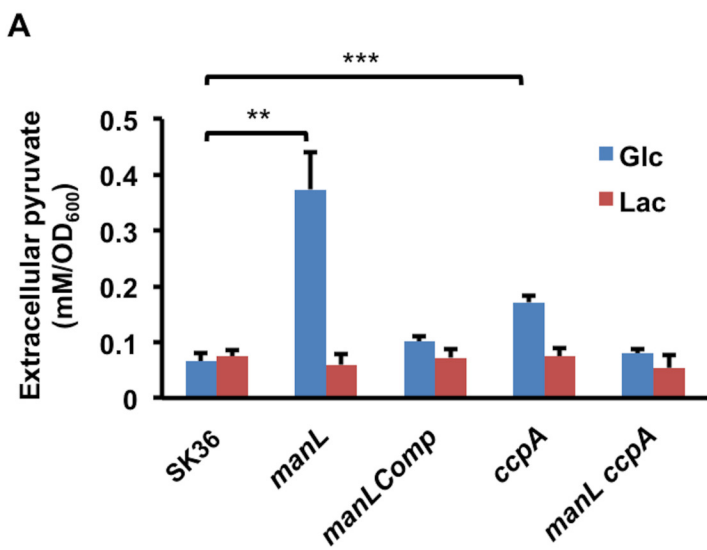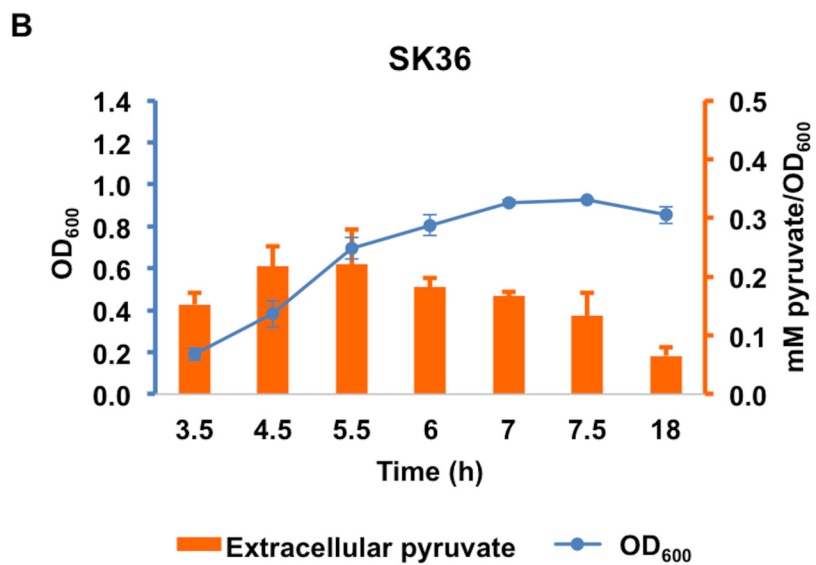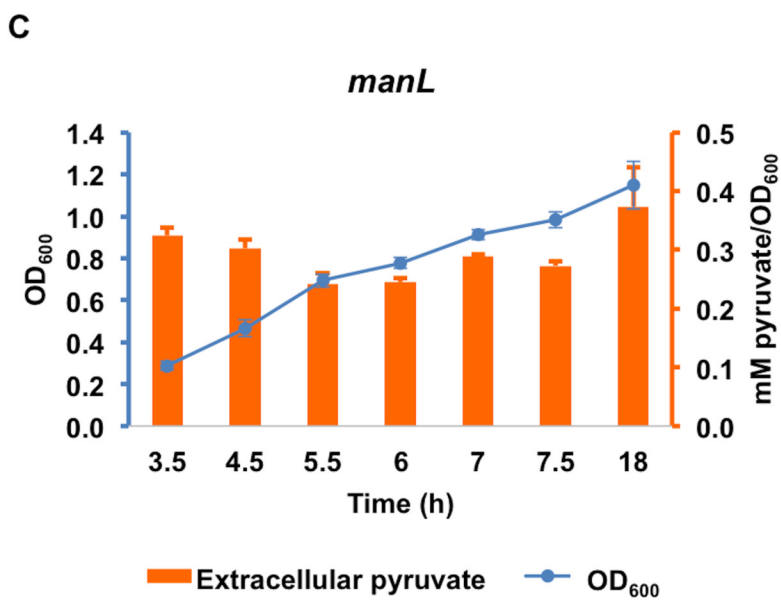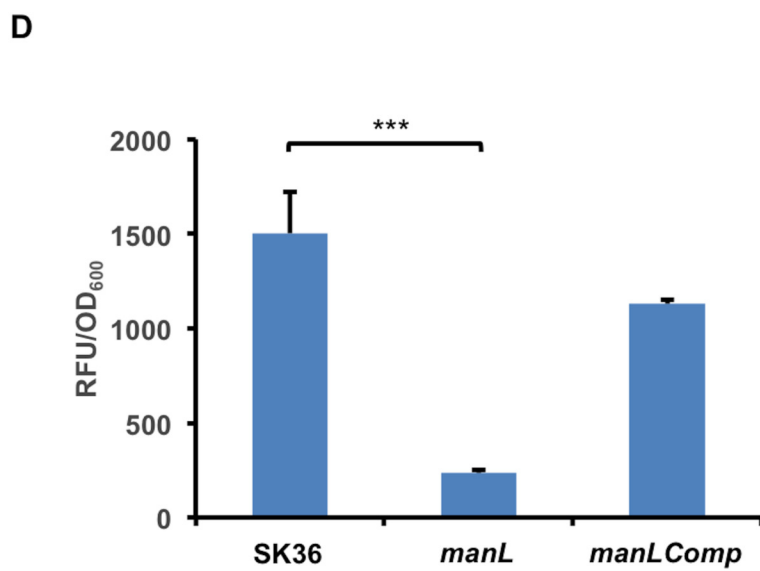

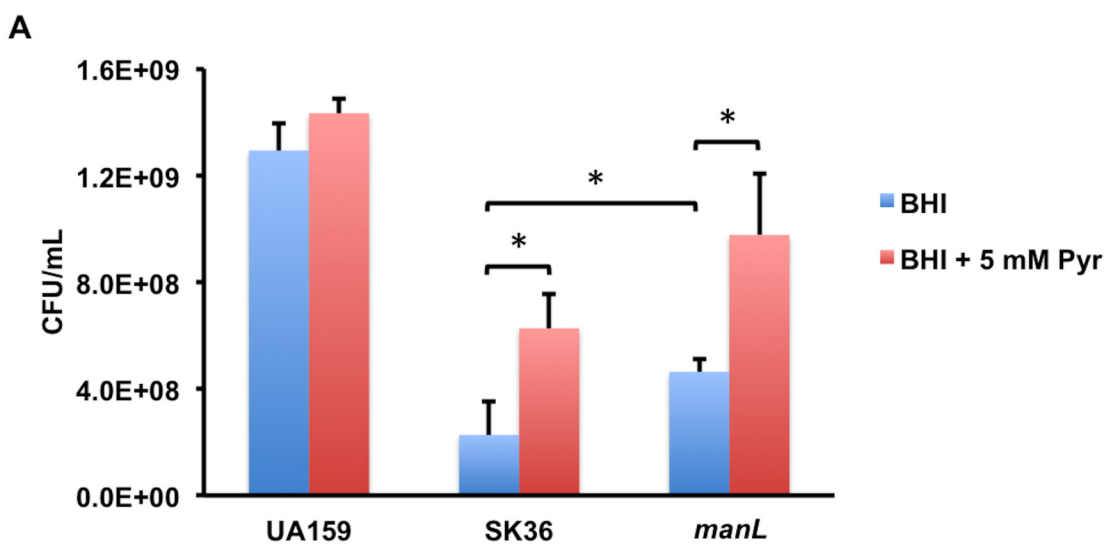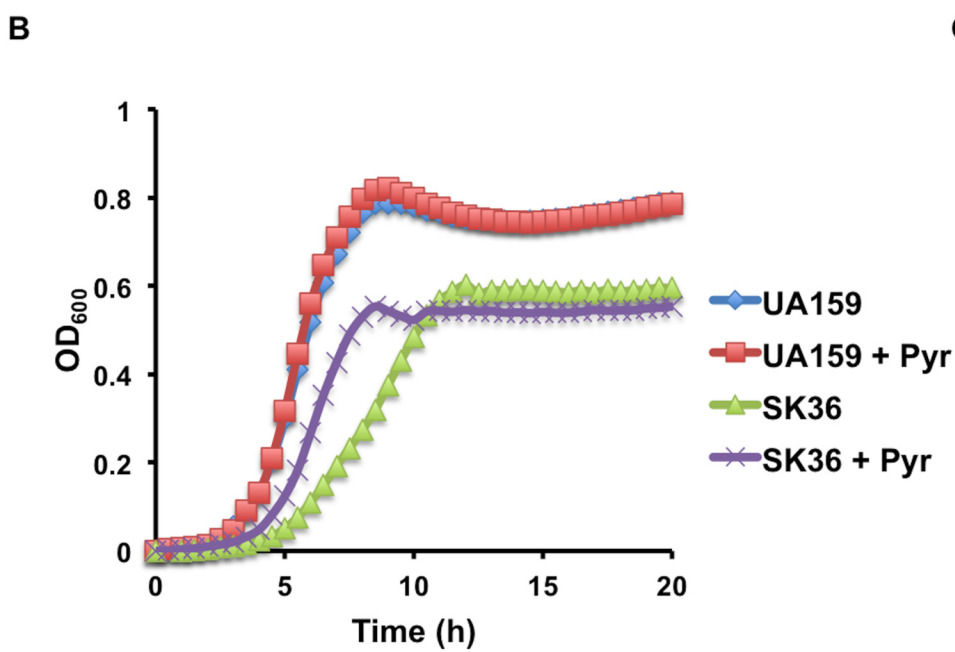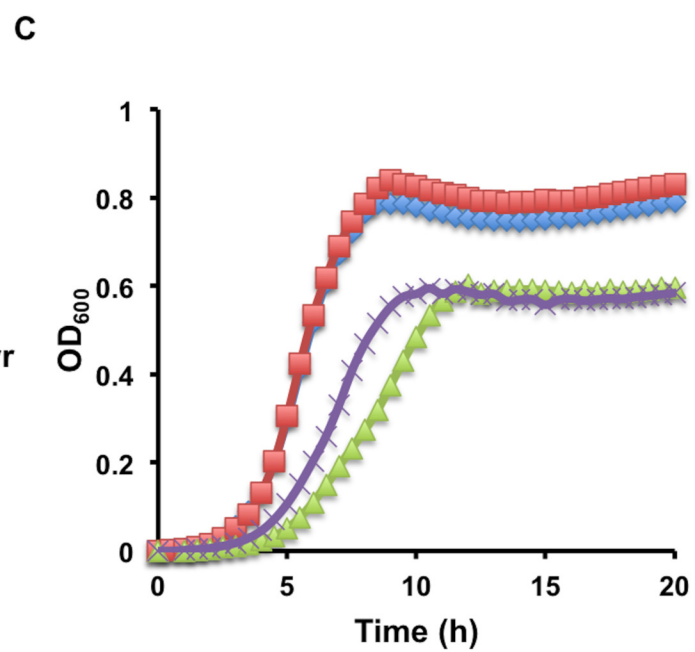

Source: https://www.biorxiv.org/content/10.1101/2021.07.15.452590v1.full.pdf
